1           **The conserved histone chaperone LIN-53 links lifespan and**  
2           **healthspan regulation in *Caenorhabditis elegans***

3  
4   **Authors:** Stefanie Müthel<sup>1,2</sup>, Bora Uyar<sup>1,2</sup>, Mei He<sup>1,2</sup>, Anne Krause<sup>1,2</sup>, Burcu Vitrinel<sup>1,2</sup>,  
5   Selman Bulut<sup>1,2</sup>, Djordje Vasiljevic<sup>2</sup>, Altuna Akalin<sup>1,2</sup>, Stefan Kempa<sup>1,2</sup>, Baris Tursun<sup>1,2#</sup>

6  
7   **Affiliations:**

8   <sup>1</sup>Berlin Institute of Medical Systems Biology,

9   <sup>2</sup>Max Delbrück Center for Molecular Medicine in the Helmholtz Association, 13125 Berlin,  
10   Germany

11  
12   **#Correspondence to:**

13   baris.tursun@mdc-berlin.de (BT)

14  
15   **Running Title:** LIN-53 links lifespan and healthspan in *C. elegans*

16  
17   **Keywords:** Aging, Healthspan, Epigenetics, Chromatin, Metabolome, *C. elegans*

18  
19  
20  
21  
22  
23  
24  
25  
26  
27  
28  
29  
30  
31  
32   **Present addresses:**

33   SM and AK: Muscle Research Unit, Experimental and Clinical Research Center (ECRC) of Charité -  
34   Universitätsmedizin Berlin and Max Delbrück Center for Molecular Medicine, Berlin, Germany

35   BV: New York University, Center for Developmental Genetics, Department of Biology, NY, USA

36   MH: College of Life Science, Northeast Forestry University, 150040 Harbin, China

37

59 **Summary**

60 Whether extension of lifespan provides an extended time without health deteriorations is an  
61 important issue for human aging. However, to which degree lifespan and healthspan  
62 regulation might be linked is not well understood. Chromatin factors could be involved in  
63 linking both aging aspects, as epigenetic mechanisms bridge regulation of different biological  
64 processes. The epigenetic factor LIN-53 (RBBP4/7) is required for safeguarding cell  
65 identities in *Caenorhabditis elegans* as well as mammals and for preventing memory loss  
66 and premature aging in humans. LIN-53 is a histone chaperone that associates with different  
67 chromatin-regulating complexes. We show that LIN-53 interacts with the Nucleosome  
68 remodeling and deacetylase (NuRD)-complex in *C. elegans* muscles to promote healthy  
69 locomotion during aging. While mutants for other NuRD members show a normal lifespan,  
70 animals lacking LIN-53 die early because LIN-53 depletion affects also the Histone  
71 deacetylase complex Sin3, which is required for a normal lifespan. To determine why *lin-53*  
72 and *sin-3* mutants die early, we performed transcriptome and metabolome analysis and  
73 found that levels of the disaccharide Trehalose are significantly decreased in both mutants.  
74 As Trehalose is required for normal lifespan in *C. elegans*, *lin-53* and *sin-3* mutants could be  
75 rescued by either feeding with Trehalose or increasing Trehalose levels via the Insulin/IGF1  
76 signaling pathway. Overall, our findings suggest that LIN-53 is required for maintaining  
77 lifespan and promoting healthspan through discrete chromatin regulatory mechanisms. Since  
78 both LIN-53 and its mammalian homologs safeguard cell identities, it is conceivable that its  
79 implication in lifespan and healthspan regulation is also evolutionarily conserved.

80

## 81 Introduction

82 The decline of physical condition and the onset of diseases such as cancer, diabetes  
83 or dementia are important issues during aging. Age-associated deterioration of health has  
84 gained importance as the human life expectancy constantly increases worldwide. It has been  
85 predicted that in 2050 adults over the age of 80 will triple compared to the year 2015 (Jaul &  
86 Barron, 2017). Hence, an important aspect of aging is whether increasing lifespan would also  
87 extend the healthspan, meaning the time of life without unfavorable health conditions.  
88 However, genetic factors that play a role in linking healthspan with lifespan regulation are  
89 largely unknown. Aging regulation by chromatin-regulating factors could play a role in linking  
90 lifespan with healthspan as loss of epigenetic gene regulation diminishes cell fate  
91 safeguarding (Kolundzic et al., 2018; Onder et al., 2012; Yadav, Quivy, & Almouzni, 2018),  
92 declines stem cell health (Brunet & Rando, 2017; Ren, Ocampo, Liu, & Belmonte, 2017),  
93 impairs muscle regeneration (Guasconi & Puri, 2009) and shortens lifespan of organisms  
94 (Field & Adams, 2017; Greer et al., 2010).

95 One specific type of epigenetic regulators are histone-chaperones, which are proteins  
96 that directly interact with histones and function as a scaffold for chromatin-modifying protein  
97 complexes (Hammond, Strømme, Huang, Patel, & Groth, 2017). They are important for  
98 folding, oligomerization, post-translational modifications, nucleosome assembly, and  
99 genomic location of histones (Hammond et al., 2017). The *C. elegans* histone-chaperone  
100 LIN-53 is highly conserved and known as RBBP4/7 (also as CAF-1p48) in mammals. LIN-53  
101 and its homologs can be found in different protein complexes that regulate the repressive  
102 and active state of chromatin (Lu & Horvitz, 1998) (Loyola & Almouzni, 2004) (Eitoku, Sato,  
103 Senda, & Horikoshi, 2008). Among those complexes are PRC2 (Polycomb repressive  
104 complex 2, (Margueron & Reinberg, 2011)), Sin3 Histone Deacetylase Complex (Sin3  
105 HDAC) (Nicolas et al., 2000), NuRD (Nucleosome remodelling and deacetylase complex  
106 (Allen, Wade, & Kutateladze, 2013)), CAF-1 histone-chaperone complex (Verreault,  
107 Kaufman, Kobayashi, & Stillman, 1996) and DRM (Dp/Rb/Muv (Harrison, Ceol, Lu, & Horvitz,  
108 2006)). In *C. elegans*, LIN-53 was shown to interact with the Rb homolog LIN-35 to  
109 antagonize the Ras signaling pathway (Lu & Horvitz, 1998). Moreover, LIN-53 and its  
110 mammalian homologs RBBP4/7 safeguard cells against reprogramming (Cheloufi et al.,  
111 2015; Tursun, Patel, Kratsios, & Hobert, 2011) and have been implicated in age-related  
112 memory loss and premature aging in humans (Pavlopoulos et al., 2013) (Pegoraro et al.,  
113 2009).

114 In this study, we revealed that LIN-53 is required for healthy motility and normal  
115 lifespan in *C. elegans*. Notably, the muscle defects and the short lifespan in *lin-53* mutants  
116 can be unlinked based on different chromatin-regulating complexes. LIN-53 is interacting  
117 with the NuRD complex to maintain muscle integrity and proper motility but requires the Sin3

118 complex to ensure normal lifespan. To understand why *lin-53* and *sin-3* mutants have a  
119 shortened lifespan, we analyzed the transcriptome as well as metabolome of mutant animals.  
120 Loss of LIN-53 or SIN-3 leads to a strong decrease in Trehalose levels - a disaccharide that  
121 is required for a normal lifespan (Y. Honda, Tanaka, & Honda, 2010), (Seo, Kingsley, Walker,  
122 Mondoux, & Tissenbaum, 2018). Restoring Trehalose levels by feeding, or genetically via the  
123 Insulin/IGF1 signaling (IIS) pathway, suppressed the short lifespan of *lin-53* and *sin-3*  
124 mutants, supporting the idea that LIN-53 and SIN-3 are required to maintain a normal  
125 lifespan via ensuring the homeostasis of metabolites such as Trehalose.

126 Overall, our findings suggest that the epigenetic factor LIN-53 links healthspan and  
127 lifespan regulation in *C. elegans*. As LIN-53 is a highly conserved chromatin regulator with an  
128 evolutionarily conserved role in cell fate safeguarding (Cheloufi et al., 2015; Tursun et al.,  
129 2011), (Cheloufi & Hochedlinger, 2017), it is conceivable that its homologs regulate lifespan  
130 and healthspan also in other species. Hence, our findings provide an initial framework for  
131 elucidating how lifespan and healthspan regulation might be linked through epigenetic  
132 factors, which could be of high relevance for human health and aging.

133

## 134 **Results**

### 135 **Loss of LIN-53 results in muscle and locomotion defects**

136 The role of the highly conserved histone chaperone LIN-53 in somatic tissues of *C.*  
137 *elegans* is poorly understood. We therefore examined *lin-53* null mutants and noticed a  
138 severe movement defect for *lin-53(n3368)* animals. They exhibit decreased mobility on solid  
139 agar plates (Fig. 1A) as well as in liquid when compared to wild-type animals (Fig. 1B) at the  
140 larval L4 stage, young adult stage and as 2 day old adults. Such motility defects can point to  
141 an impaired muscle apparatus, which prompted us to stain muscles and assess their integrity  
142 in *lin-53* mutants. Using fluorescent Phalloidin, which binds to F-actin fibers in muscles (Fig.  
143 1C), and an antibody against the myosin-heavy chain (MHC) component of body wall  
144 muscles (Fig. 1D), we observed disrupted muscle structures in *lin-53* mutants (Fig. 1C and  
145 1D). The decline in muscle integrity upon *lin-53* depletion is also evident based on animals  
146 expressing a *Pmyo-3::GFP* reporter (Fig. 1E). These muscle phenotypes in *lin-53* mutants  
147 are cell-autonomous effects as muscle-specific RNAi against *lin-53*, by using a hairpin  
148 construct (*myo-3p::lin-53* HP) also leads to muscle and motility defects (Fig. S1A and S1B).  
149 Consequently, the muscle and motility defects in *lin-53* mutants can be rescued by  
150 expressing full length LIN-53 specifically in muscles using the *myo-3* promoter (Fig. 1F and  
151 Fig. S1C). Interestingly, wt animals overexpressing *myo-3p::lin-53* or *myo-3p::GFP::lin-53*  
152 move significantly better than control animals suggesting that the overexpression of LIN-53 in  
153 muscles has a beneficial effect to maintain the motility in adult animals (Fig. S1D).

# Figure 1

Müthel et al.

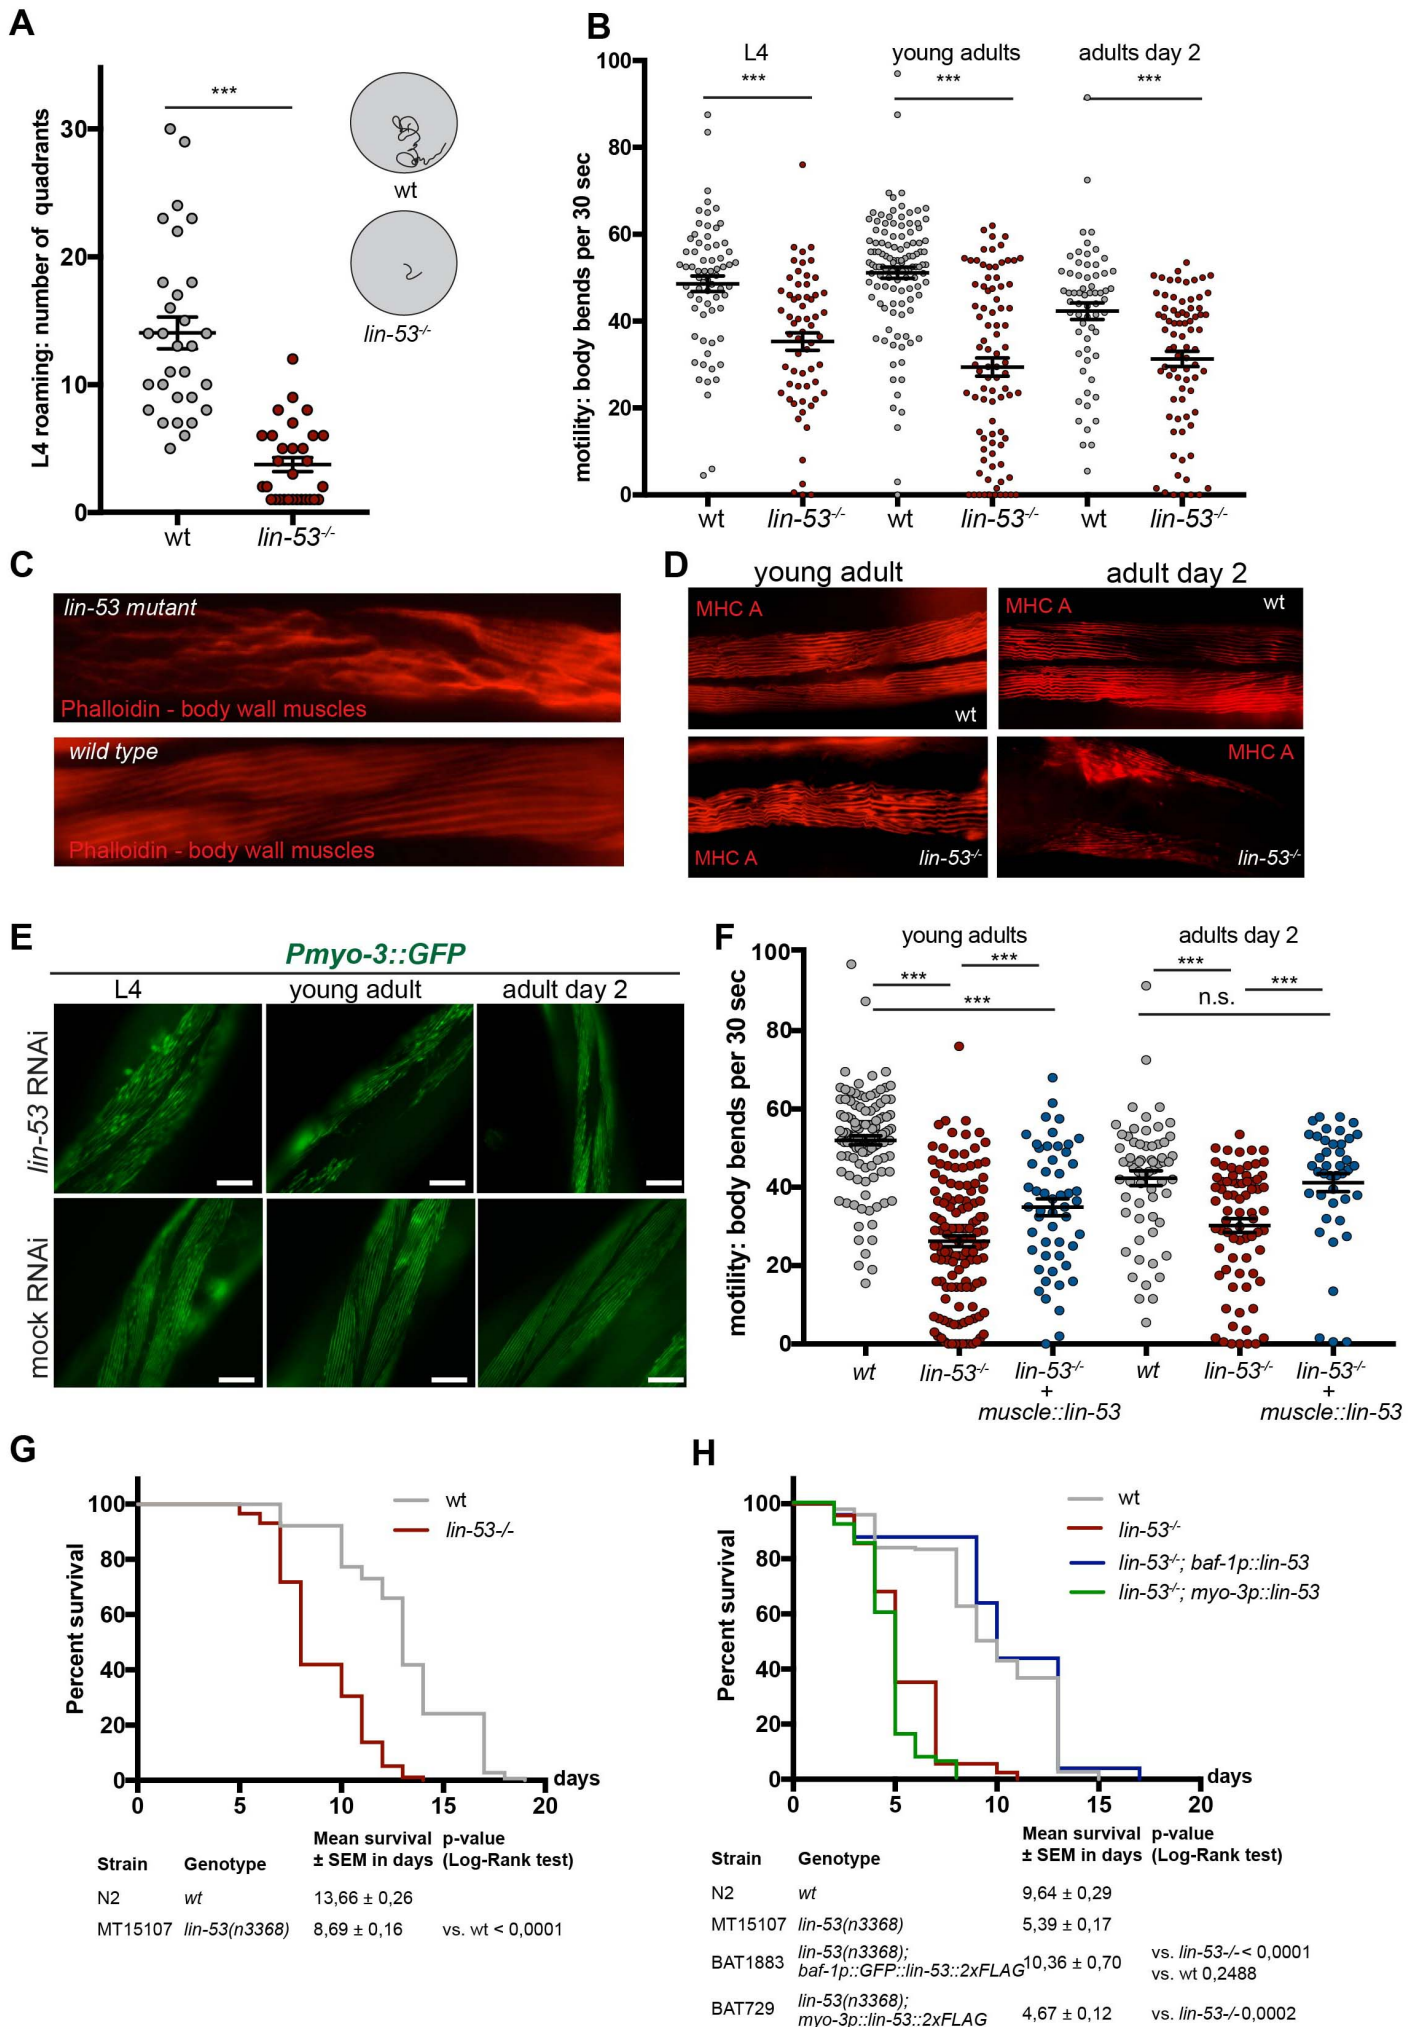

154 Overall, our findings suggest that LIN-53 is required to maintain muscle integrity and  
155 to prevent the decline of locomotion capabilities in *C. elegans*.

156

### 157 **Loss of LIN-53 shortens lifespan**

158 Since deterioration of coordinated movement is associated with aging (Herndon et al.,  
159 2002), we wondered whether *lin-53* mutants suffer from a short lifespan. Lifespan assays  
160 revealed that *lin-53(n3368)* mutants have an average lifespan which is around 40% shorter  
161 than wt animals (Fig. 1G and Table S1). A shortened lifespan is also evident in animals  
162 carrying the CRISPR/Cas9-generated *lin-53* null allele (*bar19*) (Fig. S1E and Table S1).  
163 Interestingly, the short lifespan of *lin-53* mutants is not rescued upon overexpression of *lin-53*  
164 in muscles (*myo-3p::lin-53*), which, on the other hand, rescues the motility defect as shown  
165 earlier (Figs. 1F and 1H). In contrast, ubiquitous expression of recombinant LIN-53 using the  
166 *baf-1* promoter (*baf-1p::lin-53*; Fig. 1H) rescues the short lifespan in *lin-53* mutants  
167 confirming the functionality of heterologously expressed LIN-53 fusion proteins.

168 Our observations suggest that *lin-53* is required for healthy locomotion and a normal  
169 lifespan, raising the possibility that *lin-53* links lifespan regulation with healthspan  
170 maintenance.

171

### 172 **The muscle defect of *lin-53* mutants is phenocopied upon loss of the NuRD complex**

173 LIN-53 is part of several different chromatin-regulating complexes including the CAF-  
174 1, NuRD, Sin3 and DRM complexes (Lu & Horvitz, 1998) (Loyola & Almouzni, 2004) (Eitoku  
175 et al., 2008). Hence, we wondered whether the observed phenotypes in *lin-53*-depleted  
176 animals are due to the altered function of a distinct complex. We generated an RNAi sub-  
177 library targeting all known LIN-53 interaction partners and tested whether depletion of any of  
178 the interaction partners phenocopies the observed muscle defects based on the *Pmyo-3::GFP*  
179 reporter (Fig. 2A). An impairment of muscle integrity became evident upon knock-  
180 down of genes encoding for NuRD complex members such as *lin-61*, *lin-40*, *dcp-66*, and, to  
181 a lesser degree, *let-418* and its paralog *chd-3* (Fig. 2A and 2B). This observation was further  
182 confirmed by immuno-staining of myosin (MHC) in mutant animals for NuRD-complex  
183 members (Fig. S2A), and motility assays (Fig. S2B) Overall, these findings suggested that  
184 the muscle phenotypes caused by depleting *lin-53* are due to affecting the NuRD complex.  
185 To test whether LIN-53 physically associates with the NuRD complex in muscles, we  
186 performed co-immunoprecipitation experiments coupled to mass spectrometry (IP-MS) using  
187 muscle-specific expression of FLAG-tagged LIN-53. Our muscle-specific IP-MS results  
188 revealed that LIN-53 interacts solely with chromatin-regulators that are part of the NuRD  
189 complex (Fig. S2C), strongly suggesting that LIN-53 associates with NuRD in muscles.

## Figure 2

Müthel et al.

A

### *Pmyo-3::GFP*-expressing animals on RNAi against NuRD complex members

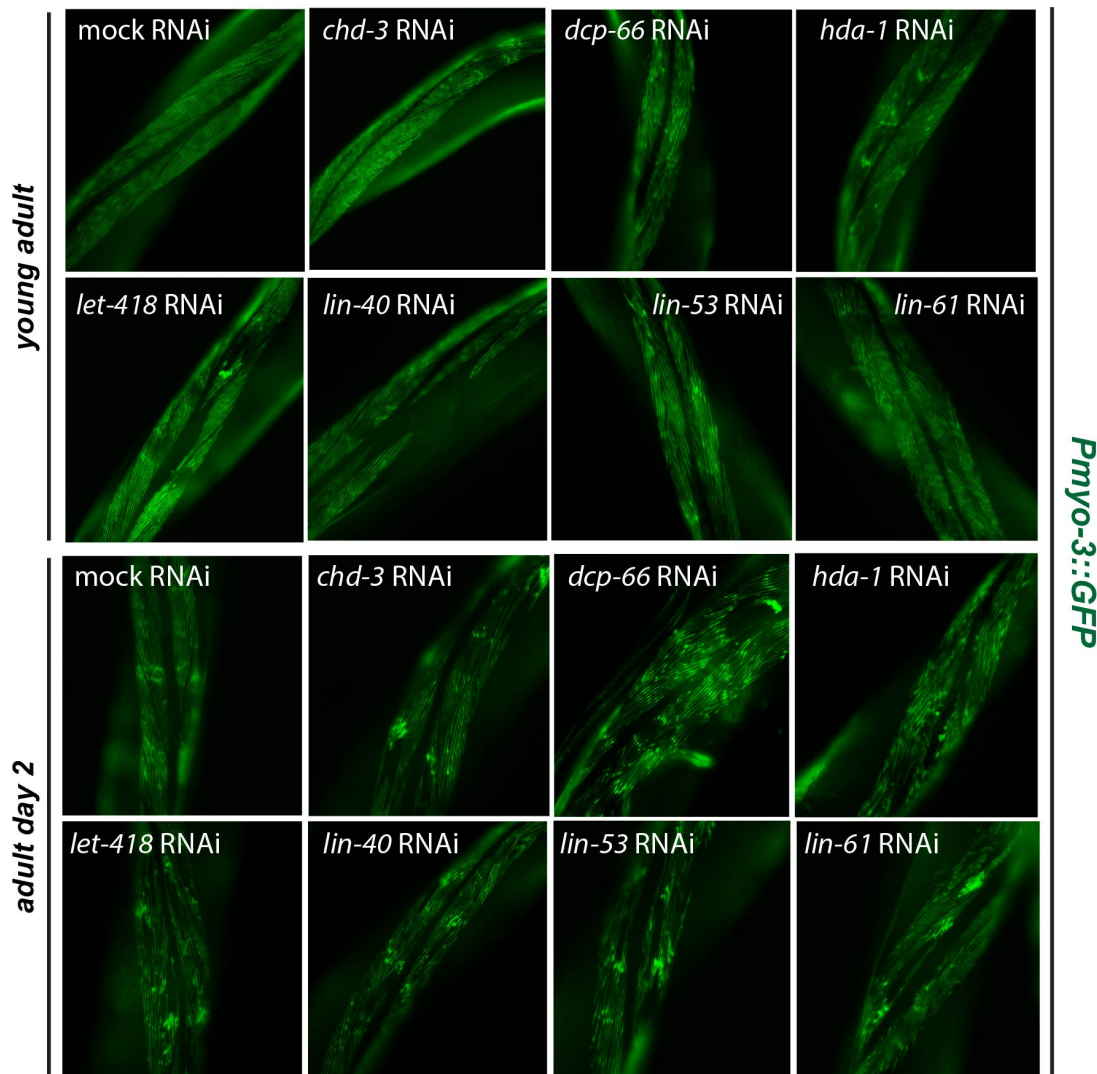

B

| Depletion of   | mammalian homolog | complex | Phenotype <i>Pmyo-3::GFP</i> |
|----------------|-------------------|---------|------------------------------|
| control        |                   |         | 0                            |
| <i>lin-53</i>  | <i>Rbbp4/7</i>    |         | ++                           |
| <i>lin-40</i>  | <i>MTA1</i>       | NuRD    | +++                          |
| <i>lin-61</i>  | <i>MBTD1</i>      |         | +++                          |
| <i>dcp-66</i>  | <i>GATAD2A</i>    |         | +++                          |
| <i>hda-1</i>   | <i>HDAC1</i>      |         | +++                          |
| <i>chd-3</i>   | <i>CHD3</i>       |         | +                            |
| <i>let-418</i> | <i>CHD4</i>       |         | +                            |
| <i>chaf-1</i>  | <i>p150</i>       |         | CAF-1                        |
| <i>lin-37</i>  |                   | DRM     | 0                            |
| <i>lin-52</i>  | <i>Lin-52</i>     |         | 0                            |
| <i>dpl-1</i>   | <i>TFDP1</i>      |         | 0                            |
| <i>hat-1</i>   | <i>HAT1</i>       | HAT1    | 0                            |
| <i>nurf-1</i>  | <i>NURF301</i>    | NURF    | +                            |
| <i>isw-1</i>   | <i>ISWI</i>       |         | 0                            |
| <i>sin-3</i>   | <i>Sin3A/B</i>    | SIN3    | +                            |

C

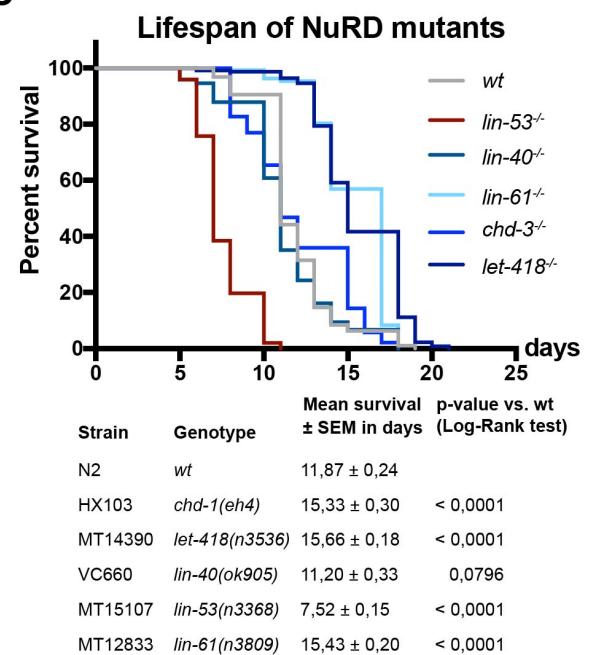

190           Next, we tested whether loss of the NuRD complex would also phenocopy the short  
191 lifespan of *lin-53* mutants. Surprisingly, depletion of NuRD members does not affect the  
192 lifespan of *C. elegans* but tends to rather increase lifespan as seen for *let-418* mutants (Fig.  
193 2C). This observation is in agreement with a previous report showing that *let-418* mutants  
194 display an extended lifespan (De Vaux et al., 2013). Hence, in muscles, LIN-53 operates as  
195 part of the NuRD complex to maintain muscle integrity but does not seem to function through  
196 NuRD to ensure a normal lifespan of the animals.

197

### 198 **Short lifespan of *lin-53* mutants is phenocopied by *sin-3* mutants**

199 The observation that LIN-53 is required for muscle maintenance but not lifespan regulation  
200 through the NuRD complex suggested that *lin-53* links healthspan with lifespan maintenance  
201 through different chromatin-regulating complexes. To identify through which complex LIN-53  
202 maintains normal lifespan, we screened for a phenocopy of the short lifespan as seen in *lin-*  
203 *53* mutants, using available mutants of known LIN-53 interacting factors (Fig. 3). A  
204 phenocopy of the short lifespan as seen for *lin-53* mutants was only detectable in *sin-3*  
205 mutants (Fig. 3A), but not upon loss of any other known gene encoding a LIN-53-interacting  
206 protein (Figs. 3B - 3E). In *C. elegans*, the *sin-3* gene encodes the core subunit of the Sin3  
207 chromatin-regulating complex, indicating that, in *lin-53* mutants, the integrity of the Sin3  
208 complex might be affected, thereby causing the observed shortening of lifespan. This  
209 conclusion is further supported by the fact that lifespan is not further decreased upon  
210 depletion of *lin-53* in *sin-3* mutants arguing that both factors are involved in the same  
211 regulatory context (Fig. S3A). Hence, LIN-53 and SIN-3 cooperate to ensure normal lifespan  
212 in *C. elegans*.

213           In summary, LIN-53 is interacting with the NuRD complex in muscles where its loss  
214 leads to a disruption of muscle integrity accompanied by locomotion defects. While affecting  
215 the NuRD complex does not lead to a short lifespan, loss of the Sin3 core subunit shortens  
216 lifespan, suggesting that LIN-53 regulates muscle homeostasis as part of the NuRD complex  
217 independently of lifespan regulation, which occurs through the Sin3 complex.

218

### 219 **Transcriptome of *lin-53* mutants shows mis-regulated metabolic genes**

220 The shortened lifespan upon loss of LIN-53 suggested that specific molecular pathways  
221 might be affected in *lin-53* mutants. In order to examine this possibility, we performed whole  
222 transcriptome sequencing (RNA-Seq) and used both *lin-53* mutant backgrounds *n3668*  
223 (balanced) and *bar19* (CRISPR allele) (Fig. 4A). Our analysis revealed that 5.799 genes are  
224 differentially expressed in both *lin-53* mutant backgrounds when compared to the  
225 transcriptome of wild-type N2 animals (Figs. 4B and S4A). A number of muscle-related  
226 genes such as *hlh-1*, *unc-120*, *unc-52*, and *myo-3* are mis-regulated, which corresponds to



### Figure 3

Müthel et al.

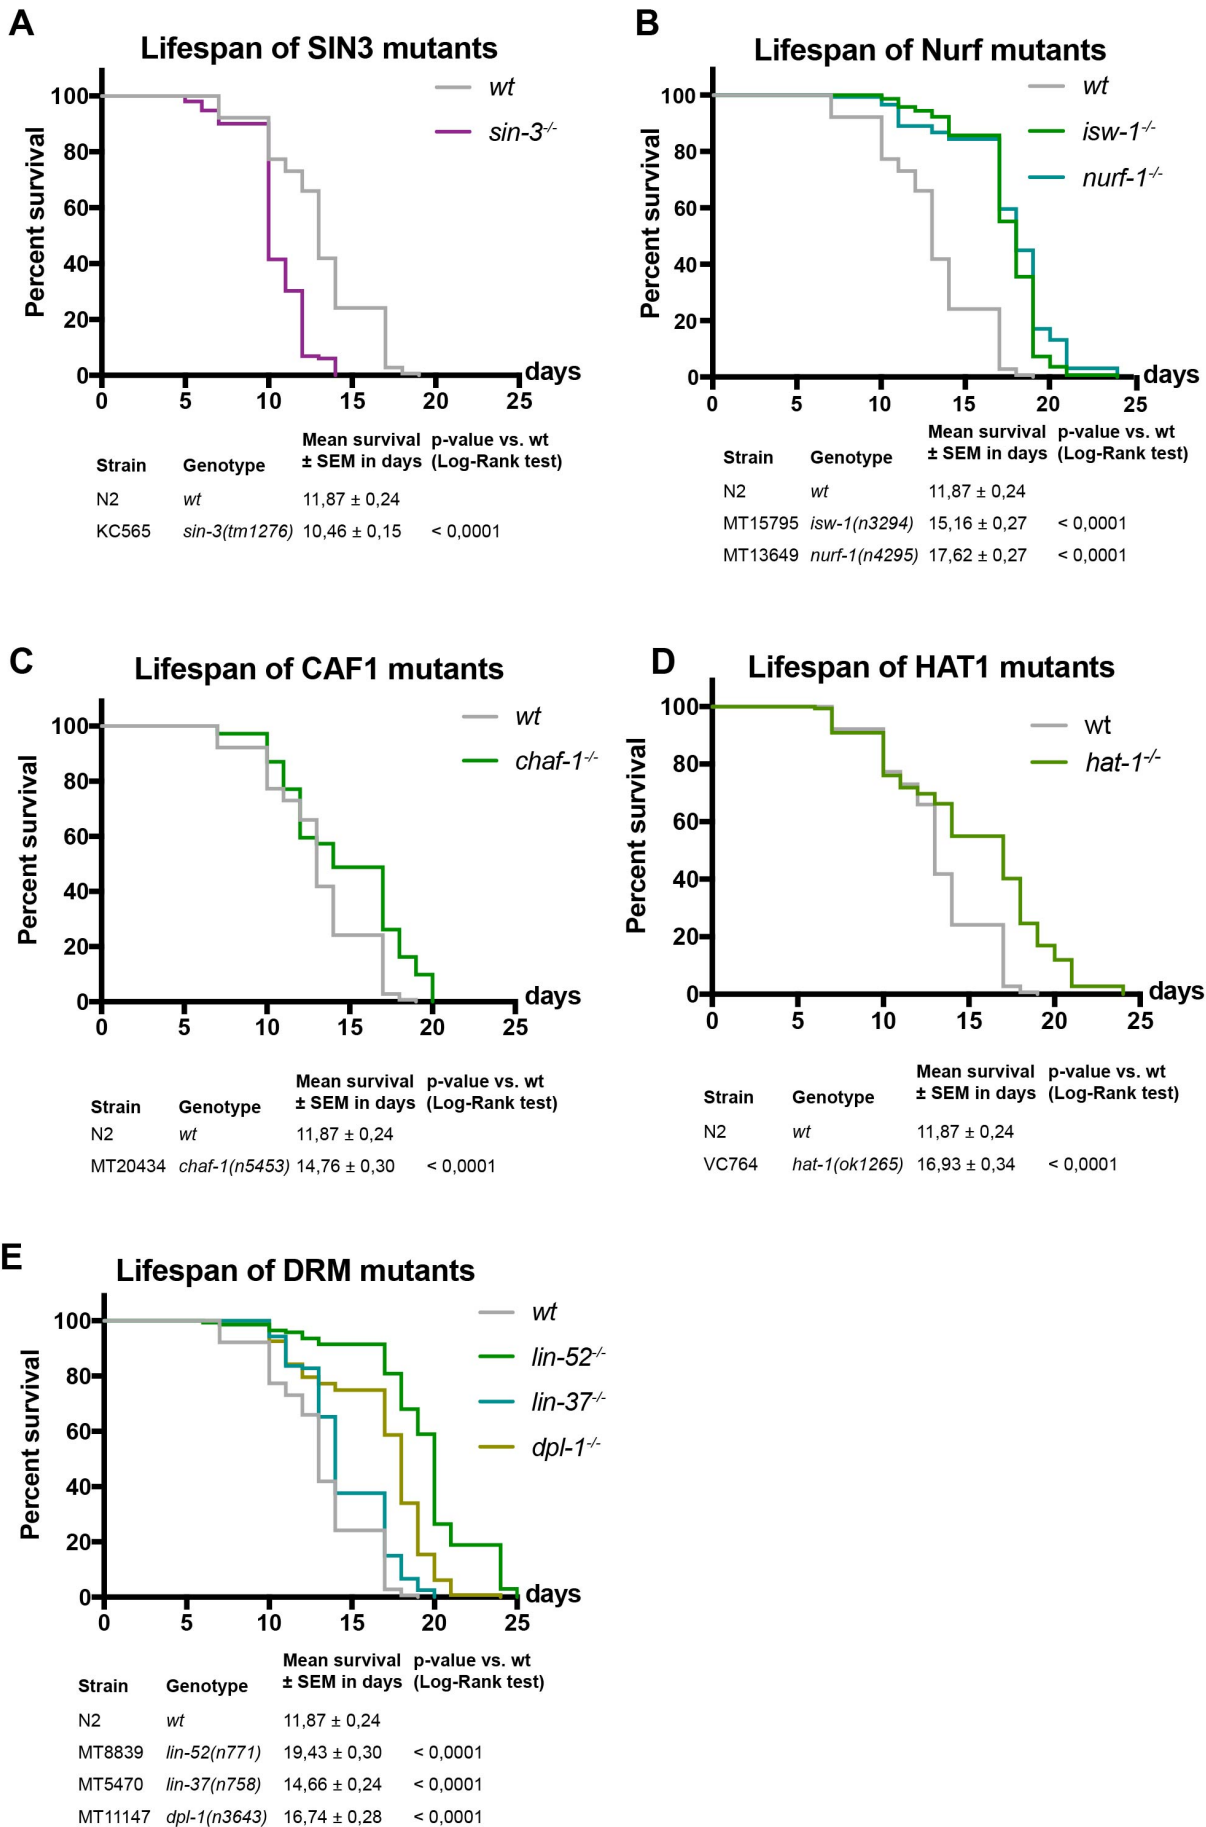

227 the described motility defects in *lin-53* mutants (Fig. S4B). Interestingly, in both *lin-53* mutant  
228 backgrounds GO analysis (KEGG pathways) revealed a strong enrichment for differentially  
229 expressed genes that play a role in metabolic pathways (Figs. 4C and 4D). Since loss of  
230 SIN-3 phenocopies the short lifespan of *lin-53* mutants we also performed RNA-Seq analysis  
231 of the *sin-3(tm1276)* mutant background (Fig. 4E). Compared to *lin-53* mutants more than  
232 50% of the differentially expressed genes in *sin-3* mutants overlap with those detected in  
233 both *lin-53* mutant backgrounds (Fig. 4E). Strikingly, GO analysis revealed a strong  
234 enrichment for genes that play a role in metabolic pathways also for *sin-3* mutants (Fig. 4F)  
235 suggesting that LIN-53 cooperates with SIN-3 in order to regulate metabolism. To elucidate  
236 whether LIN-53 might directly be involved in regulating the expression of ‘metabolic’ genes,  
237 we performed Chromatin Immunoprecipitation with subsequent sequencing (ChIP-Seq) using  
238 anti-LIN-53 antibody (Fig. 4G). The ChIP-Seq analysis revealed that the primary enriched  
239 pathway for genes which are bound by LIN-53 and become down-regulated upon loss of LIN-  
240 53, are implicated in metabolic pathways (Fig. 4G). This finding further corroborates the  
241 notion that LIN-53 is important for maintaining expression of genes that are important for  
242 metabolic processes. Since it is well established that metabolome alterations have a  
243 significant impact on aging (reviewed in (Peleg, Feller, Ladurner, & Imhof, 2016), (Finkel,  
244 2015)), we propose that LIN-53 is required for normal lifespan of *C. elegans* because it is  
245 maintaining the expression of genes that ensure a wild-type metabolome.

246

#### 247 **Loss of *lin-53* leads to decreased levels of Trehalose**

248 Next, we aimed to assess whether loss of LIN-53 leads to specific changes in the  
249 metabolome as suggested by the transcriptome and ChIP-Seq analyses. We examined the  
250 metabolome of *lin-53* and *sin-3* mutants at the young adult stage using Gas Chromatography  
251 coupled to Mass Spectrometry (GC-MS) and MS data analysis using Maui-SILVIA (Kuich,  
252 Hoffmann, & Kempa, 2014) (see methods) (Fig. 5A). Wild-type animals were used as a  
253 control, as well as *let-418* mutants (NuRD complex). Since *let-418* mutant animals do not  
254 have a shortened lifespan (Fig. 2C), metabolites that change in *lin-53* and *sin-3* mutant  
255 animals, but not in *let-418* mutants, are likely to be implicated in the short lifespan phenotype  
256 upon loss of *lin-53* or *sin-3*. The unique metabolite, which showed such a pattern was the  
257 glucose disaccharide Trehalose. Trehalose levels are decreased in *lin-53* and *sin-3* mutants  
258 but not in *let-418* mutants (Fig. 5A). Interestingly, it has previously been shown that  
259 decreased Trehalose levels lead to a shortened lifespan in *C. elegans* (Y. Honda et al.,  
260 2010), (Seo et al., 2018) suggesting that reduced Trehalose levels in *lin-53* and *sin-3*  
261 mutants may cause the observed short lifespan of these animals. Impaired maintenance of  
262 Trehalose levels is also reflected by the fact that reporter expression for the Trehalose 6-  
263 Phosphate Synthase-encoding genes *tps-1* and *tps-2* (Y. Honda et al., 2010), which are

## Figure 4

Müthel et al.

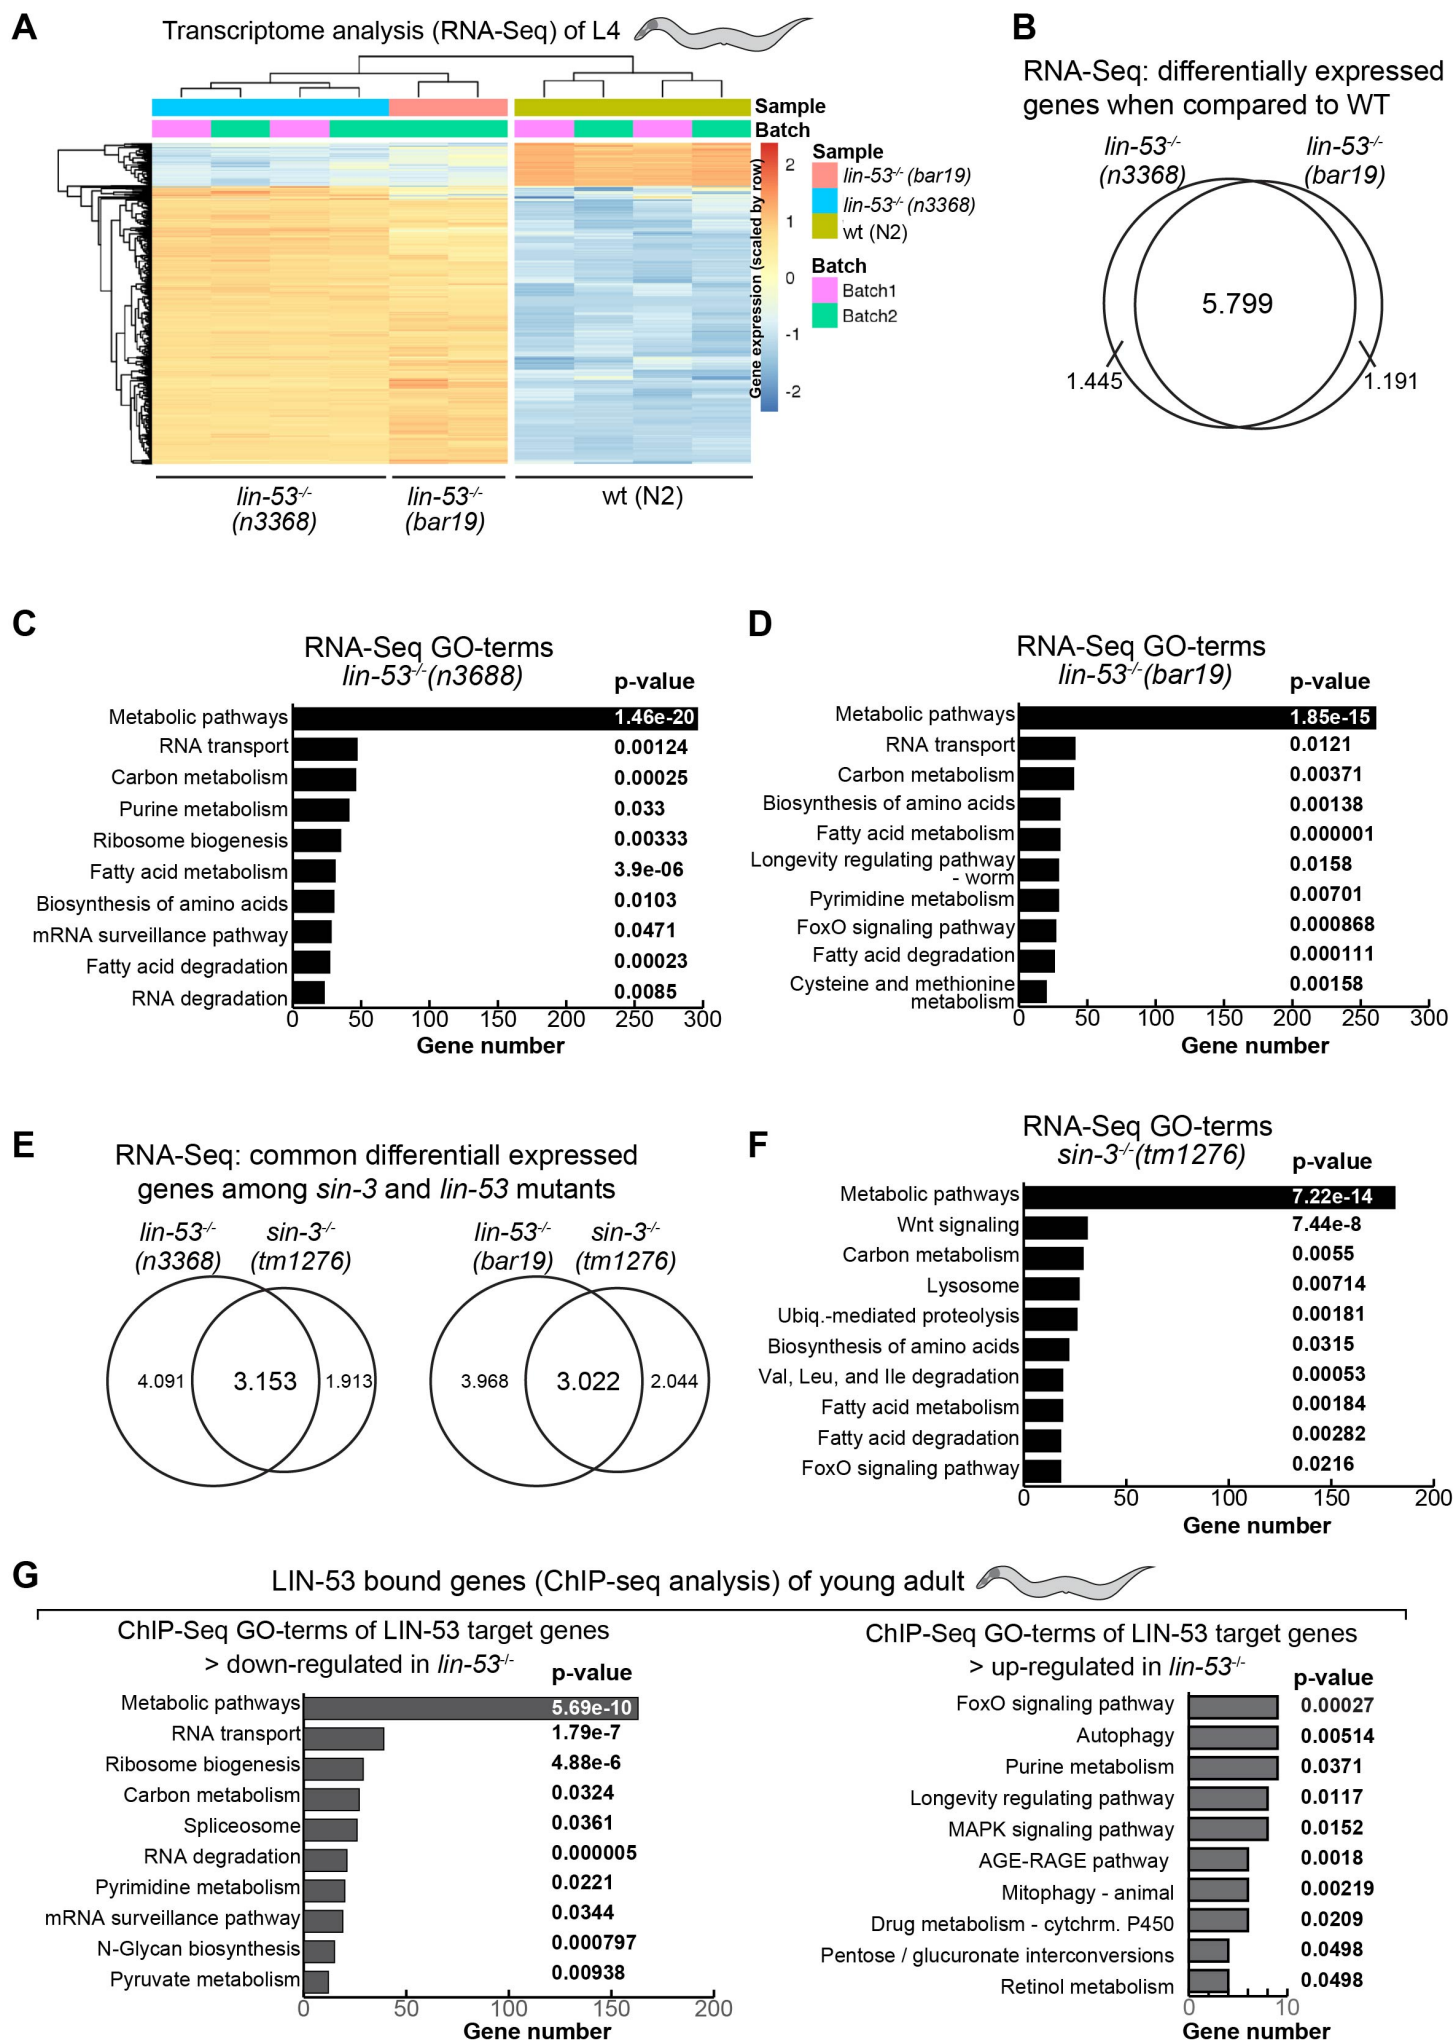

264 essential for Trehalose synthesis, are reduced upon knock-down of *lin-53* (Fig. 5B, and Fig.  
265 S5A). Analysis by qRT-PCR (Fig. 5B) confirmed a down regulation of *tps-1* in short-lived *lin-*  
266 *53* and *sin-3* mutants, but not in long-lived *lin-40* and *let-418* mutants.

267 To provide further evidence that Trehalose reduction contributes to shortening the  
268 lifespan in *lin-53* and *sin-3* mutants, we tested whether feeding of Trehalose would alleviate  
269 the aging phenotype (Fig. 5C). Replenishing *lin-53* and *sin-3* mutants with Trehalose by  
270 feeding resulted in extended lifespans compared to unfed mutants (Fig. 5C) indicating that  
271 reduced levels of Trehalose play a role in shortening the lifespan upon loss of *lin-53*.

272

### 273 **Loss of LIN-53 affects the Insulin signaling (IIS) pathway**

274 Recently, it has been demonstrated that the Insulin/IGF1 signaling (IIS) pathway is  
275 important to promote the benefits of Trehalose in the context of lifespan maintenance (Seo et  
276 al., 2018). It is important to note in this context that animals carrying loss of function alleles of  
277 the *daf-2* gene, which encodes the IIS receptor, were identified as one of the first mutants  
278 with significantly extended lifespans (reviewed in (Kenyon, 2011)) and it has been reported  
279 that Trehalose synthesis is up-regulated in *daf-2* mutants (Hibshman et al., 2017; Y. Honda et  
280 al., 2010).

281 In order to test whether LIN-53 is implicated in regulating Trehalose levels via the IIS  
282 pathway we first assessed the lifespan of *lin-53(n3368); daf-2(e1370)* double mutants (Fig.  
283 6A). While the *lin-53(n3368); daf-2(e1370)* double mutants live longer than *lin-53* mutants  
284 alone, which is comparable to the lifespan of wild-type animals, they live significantly shorter  
285 than *daf-2* mutants alone suggesting a requirement for LIN-53 in IIS pathway-mediated  
286 lifespan extension (Fig. 6A). Similar results were obtained when comparing lifespans of the  
287 double *sin-3(tm1276); daf-2(e1370)* animals with the respective single mutants (Fig. 6B).  
288 These observations suggested that the previously reported increase of Trehalose levels in  
289 *daf-2* mutants (Y. Honda et al., 2010) might compensate for the diminished Trehalose levels  
290 upon loss of LIN-53 and SIN-3. To test this assumption, we analyzed the metabolome of *lin-*  
291 *53(n3368); daf-2(e1370)* as well as *sin-3(tm1276); daf-2(e1370)*, and found that Trehalose  
292 levels in both double mutants are similar to that of wild-type animals (Fig. 6C). We therefore  
293 concluded that *daf-2* mutants suppress the short lifespan of *lin-53* and *sin-3* mutants by  
294 counteracting the Trehalose deprivation upon loss of LIN-53 or SIN-3.

295 Overall, our findings suggest that LIN-53 maintains sufficient Trehalose levels to  
296 ensure a normal lifespan in conjunction with SIN-3 and this maintenance has interplay with  
297 the IIS pathway in *C. elegans*. Moreover, the muscle defects and short lifespan in *lin-53*  
298 mutants can be unlinked: LIN-53 is interacting with the NuRD complex to maintain muscles  
299 and proper motility but ensures normal lifespan via the Sin3 complex (Fig. 6D). Loss of LIN-  
300 53 or SIN-3 leads to diminished levels of the disaccharide Trehalose, which is required for a

Figure 5

Müthel et al.

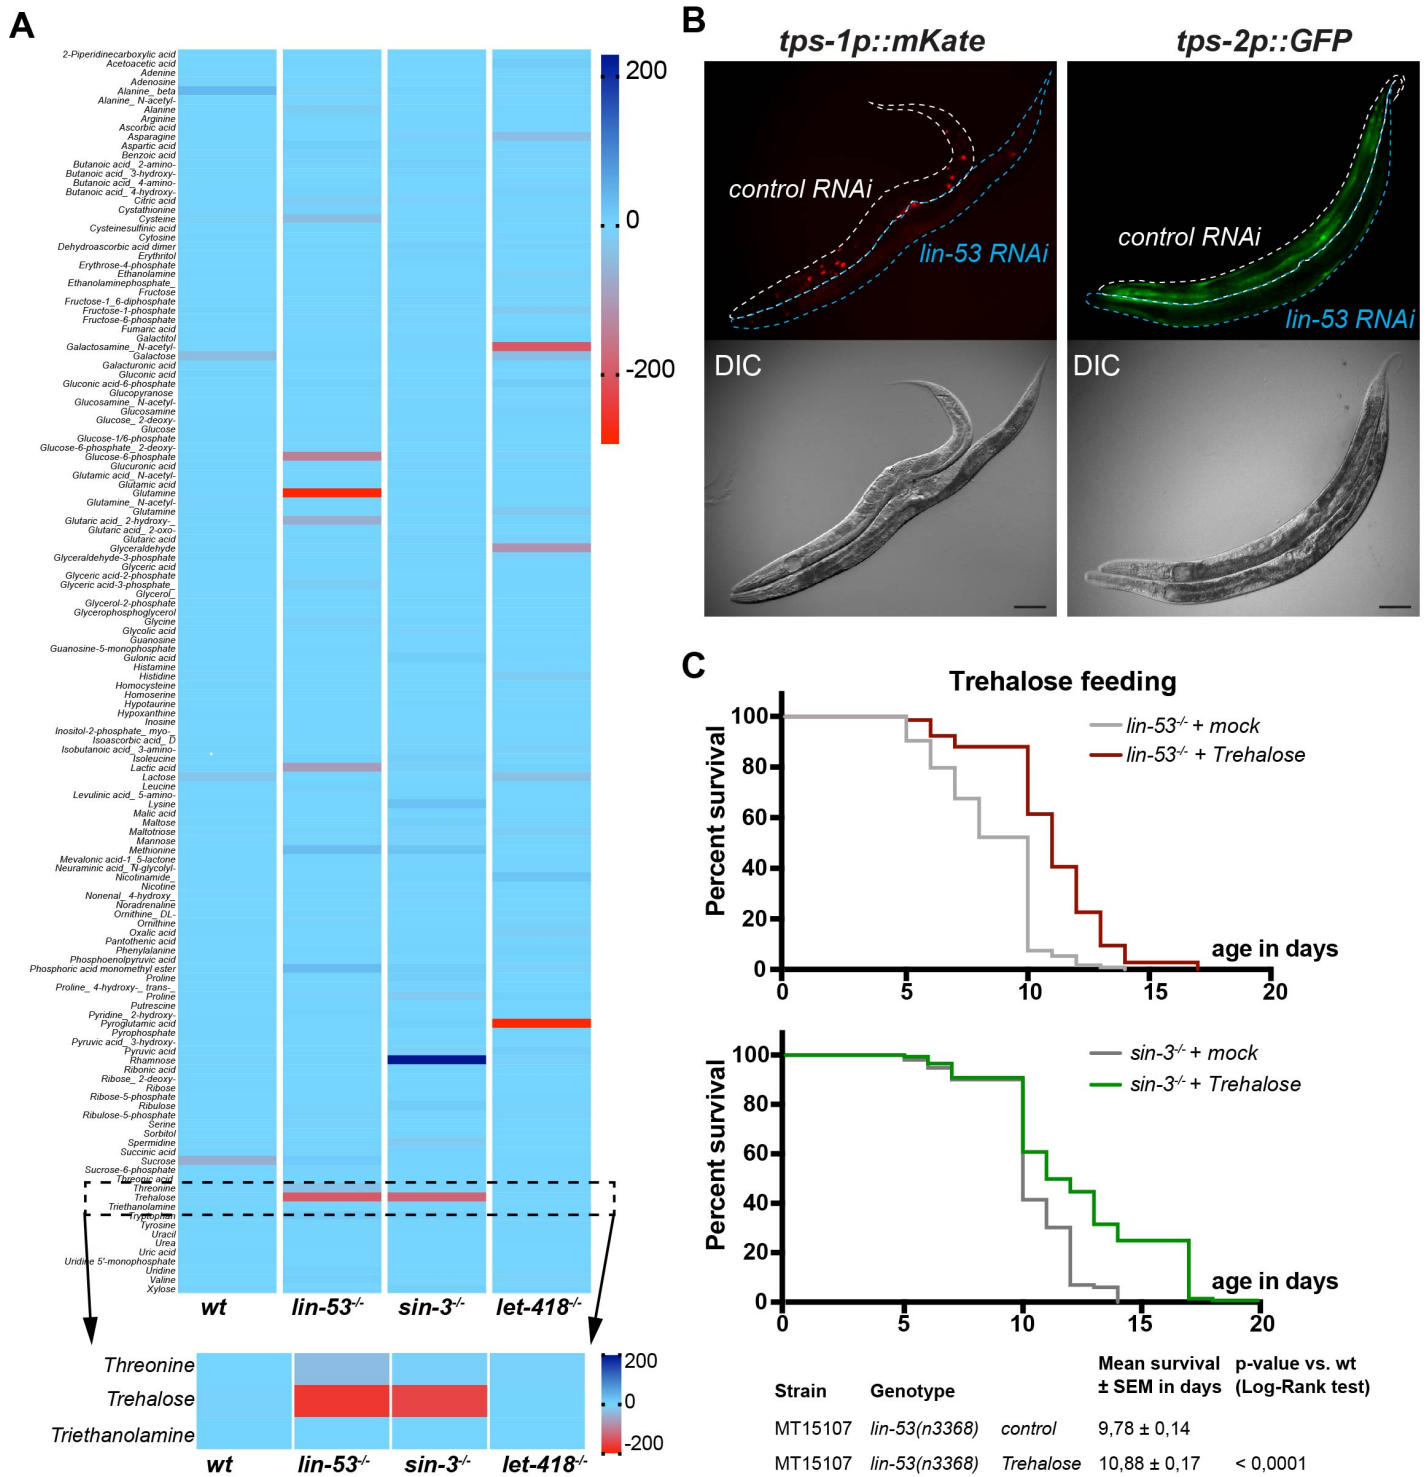

301 normal lifespan (Y. Honda et al., 2010),(Seo et al., 2018). These findings suggest that the  
302 histone chaperone LIN-53 is a critical chromatin regulator linking the epigenetic regulation of  
303 healthspan and lifespan.

304

## 305 **Discussion**

306 Recent studies revealed epigenetic factors as an emerging group of aging regulators  
307 that control gene expression at the level of chromatin (reviewed in (Brunet & Rando, 2017)).  
308 For instance, the ASH-2 trithorax complex regulates aging in *C. elegans* by catalyzing  
309 histone H3 methylation at Lysine residue 4 (K4) (Greer et al., 2010) and loss of epigenetic  
310 regulation in mouse hematopoietic stem cells accelerates aging (Chambers et al., 2007). In  
311 the context of aging regulation, one important aspect is whether healthspan and lifespan are  
312 intimately linked. Meaning, should we expect that animals or humans with longer lifespans  
313 would also be healthy for a longer time? Interestingly, a recent study by the research group  
314 of Heidi Tissenbaum suggests, that lifespan and healthspan can be unlinked in *C. elegans*  
315 (Bansal, Zhu, Yen, & Tissenbaum, 2015). For instance, the authors showed that in many  
316 cases, when lifespan is extended, there is an increase in the time for which animals live in a  
317 frail state (Bansal et al., 2015). As many aging-regulating pathways are evolutionarily  
318 conserved, an unlinking of lifespan and healthspan is conceivable also in higher organisms.  
319 Our findings described in this study corroborate this notion as the histone chaperone LIN-53  
320 is highly conserved in metazoan species (known as RBBP4/7 and CAF-1p48 in mammals)  
321 (Harrison et al., 2006). We found that overexpression of the chromatin regulator LIN-53  
322 specifically in muscles of *C. elegans*, rescued the *lin-53* null-mutant phenotype with regard to  
323 the muscle and motility defects. Strikingly, high levels of LIN-53 in muscles are beneficial  
324 because motility remained in a healthy wild type-like state even in aged animals. However,  
325 while muscle-specific LIN-53 overexpression reconstituted muscle health in *lin-53* mutants,  
326 the lifespan of these animals remained short, which suggested that the effects of LIN-53 on  
327 muscle health and lifespan are separable. Our finding that LIN-53 associates with the NuRD  
328 complex in muscles in order to maintain muscle integrity, while its role in lifespan  
329 homeostasis is mediated via the Sin3 complex, confirmed this initial assumption. RNA-Seq  
330 analysis of mutant *lin-53* animals further indicates a global mis-regulation of muscle genes  
331 such as the myosin heavy chain-encoding genes *unc-54* and *myo-3* as well as muscle  
332 transcription factors including HLH-1 and HND-1, which could explain the observed muscle  
333 and motility phenotypes upon loss of *lin-53* and NuRD components. Notably, mutants for the  
334 NuRD subunit LET-418 have an increased lifespan, but still show a compromised movement  
335 suggesting that loss of the NuRD complex only affects muscle integrity. While the exact  
336 molecular mechanism by which LIN-53 regulates muscle homeostasis remains to be

## Figure 6

Müthel et al.

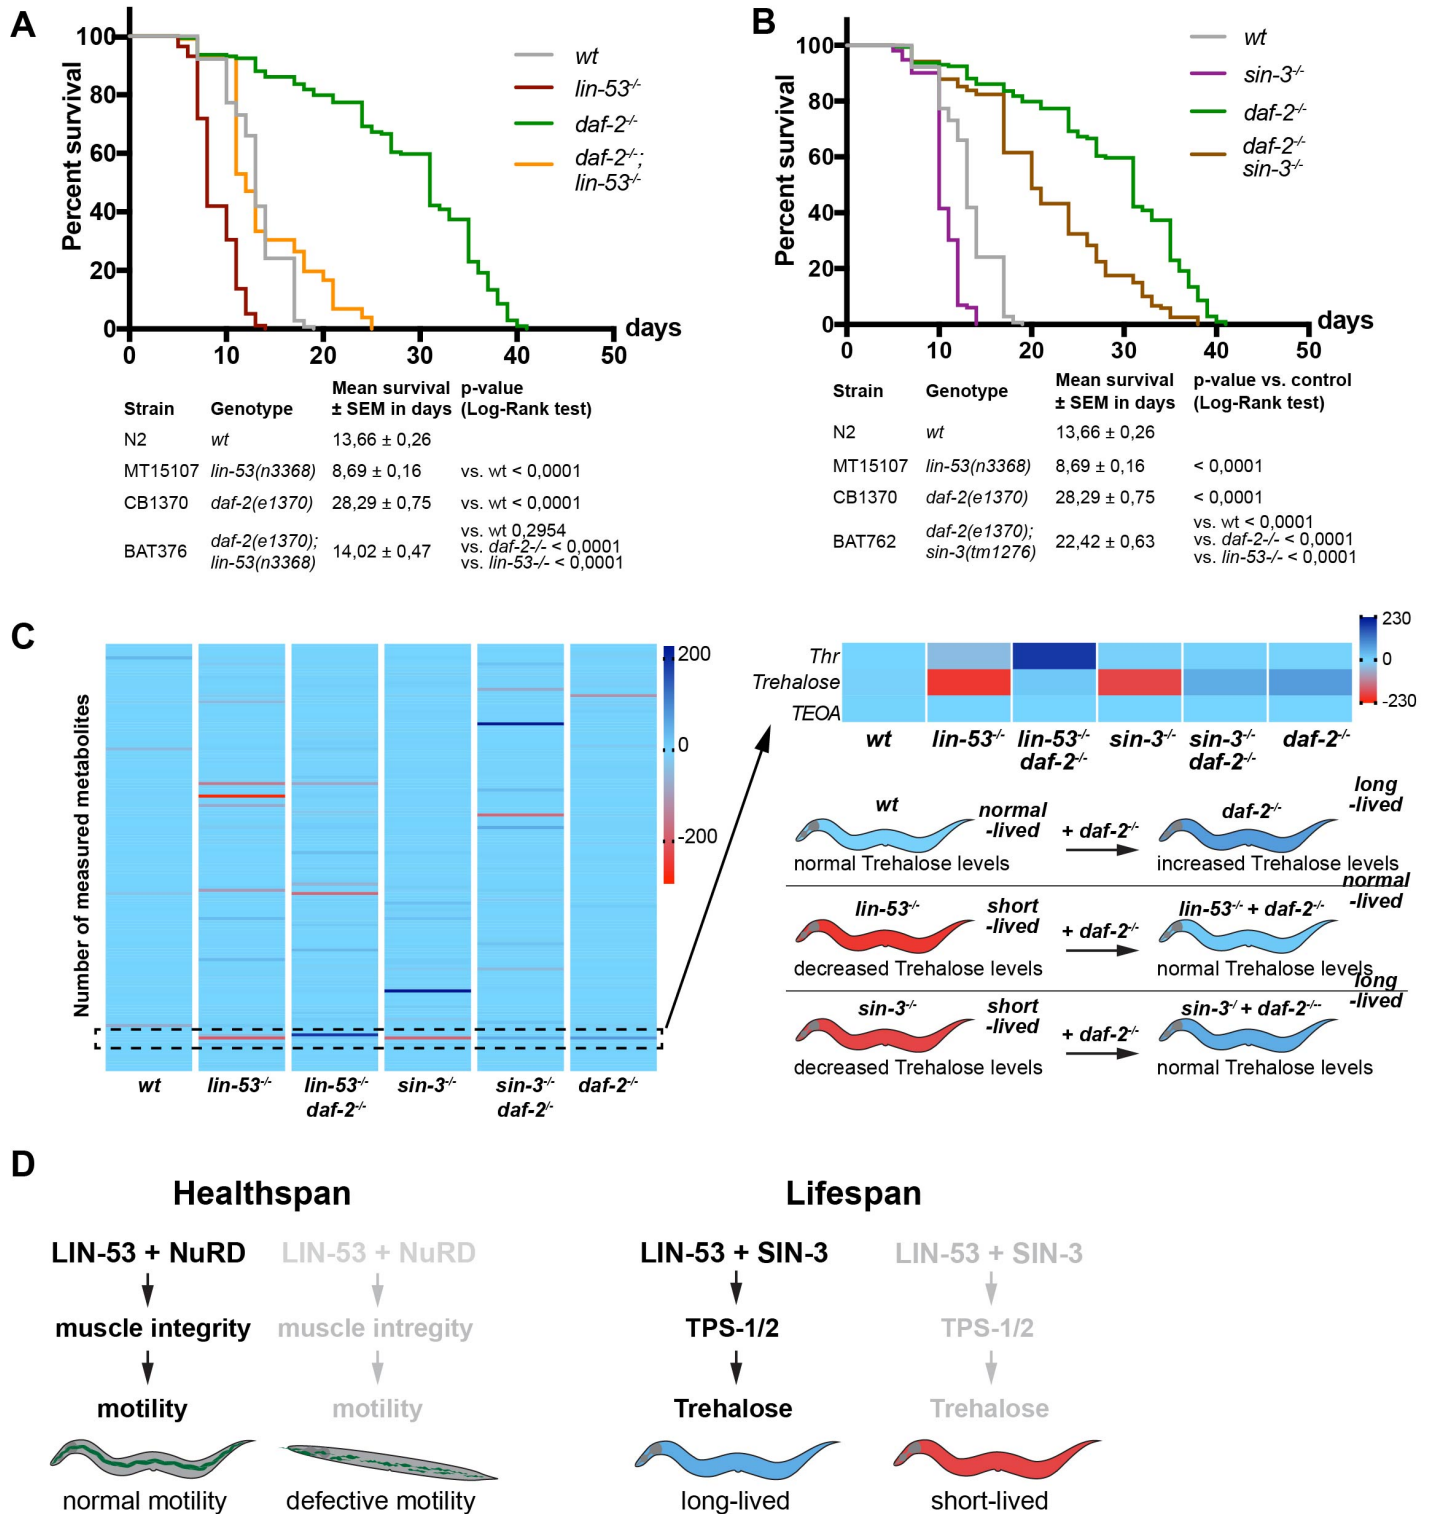

337 determined, our findings provide an important initial framework for elucidating LIN-53's roles  
338 in muscles via the NuRD complex.

339 With respect to the aging phenotype of *lin-53* mutants we found that the shortened  
340 lifespan is caused by loss of the Sin3 complex. Animals deleted for the *sin-3* gene  
341 phenocopy not only the short lifespan of *lin-53* mutants but also show similar patterns of  
342 gene expression changes when compared to wild-type animals. The fact that loss of either  
343 *lin-53* or *sin-3* primarily affects mainly the expression of genes related to metabolic  
344 processes prompted us to assess changes in the metabolome in these mutants. Strikingly,  
345 our analysis showed that Trehalose levels are diminished in both *lin-53* and *sin-3* mutants,  
346 thereby revealing a possible common factor with regard to impacting lifespan regulation. It is  
347 known that decreased Trehalose levels result in a shorter lifespan in *C. elegans*, as,  
348 described earlier (Y. Honda et al., 2010). Our finding that Trehalose levels are reconstituted  
349 when we combined either *lin-53* or *sin-3* mutants with the *daf-2* mutant background is,  
350 therefore, in agreement with previous studies showing that the insulin/IGF-signaling (IIS)  
351 pathway controls Trehalose levels and that loss of DAF-2 results in increased Trehalose  
352 levels (Y. Honda et al., 2010).

353 A conserved role for LIN-53 in aging regulation is conceivable because its human  
354 homologs RBBP4 and RBBP7 have been implicated in Hutchinson–Gilford Progeria  
355 Syndrome (HGPS), which leads to premature aging (Pegoraro et al., 2009). HGPS belongs  
356 to laminopathic disorders caused by mutations in genes encoding for lamin A/C or for other  
357 nuclear lamina proteins such as Emerin (Zaremba-Czogalla, Dubińska-Magiera, & Rzepecki,  
358 2010). In primary dermal fibroblasts of HGPS patients, RBBP4/7 levels are significantly  
359 reduced, which is also the case in fibroblasts from aged human beings (Pegoraro et al.,  
360 2009). However, in their study Pegoraro et al. proposed that the premature aging disorder is  
361 caused by the loss of functional NuRD complexes due to reduced levels of RBBP4/7  
362 (Pegoraro et al., 2009). While we do not see premature aging upon depletion of specific  
363 NuRD subunits such as LIN-40, LIN-61, or LET-418 in *C. elegans*, we identified the Sin3  
364 complex to be relevant for the aging phenotype upon loss of LIN-53. We speculate that the  
365 Sin3 complex might also play a role during aging regulation in other species as it has also  
366 been shown by a previous study in *Drosophila* that knock-down of the Sin3A gene causes a  
367 shortened lifespan (Barnes et al., 2014).

368 In humans LIN-53 homologs might link aging regulation with healthspan as we see it  
369 in the *C. elegans*. Laminopathies such as the Emery–Dreifuss Muscular Dystrophy (EDMD)  
370 diminish muscle maintenance and motility in patients (Zaremba-Czogalla et al., 2010).  
371 Laminopathies in general might affect RBBP4/7 levels as shown in the laminopathic disorder  
372 HGPS thereby recapitulating the phenotypes of *lin-53* mutant worms. Hence, reduced levels  
373 of LIN-53 and its homologs RBBP4/7 might lead to premature aging and impaired



374 maintenance of muscle integrity in *C. elegans* as well as humans. Interestingly, it has  
375 recently been revealed that the decline of RBBP4 in humans causes cognitive aging and  
376 memory loss (Pavlopoulos et al., 2013). Hence, it is conceivable that the role of LIN-53 as a  
377 link of lifespan regulation with healthspan maintenance might be conserved also in higher  
378 organisms, which can have important implications for human health during aging.  
379

380 **Experimental Procedures**

381 List of strains used in this study.

| Strain name | Genotype                                                     | Reference  |
|-------------|--------------------------------------------------------------|------------|
| N2          | <i>wt</i>                                                    | CGC        |
| MT15107     | <i>lin-53(n3368)</i>                                         | CGC        |
| CB1370      | <i>daf-2(e1370)</i>                                          | CGC        |
| BAT376      | <i>daf-2(e1370); lin-53(n3368)</i>                           | this study |
| BAT1883     | <i>lin-53(n3368); barEx974 [baf-1p::GFP::lin-53::2xFLAG]</i> | this study |
| BAT729      | <i>lin-53(n3368); barIS87 [myo-3p::lin-53::2xFLAG]</i>       | this study |
| HX103       | <i>chd-3(eh4)</i>                                            | CGC        |
| VC924       | <i>dcp-66(gk370)</i>                                         | CGC        |
| MT14390     | <i>let-418(n3536)</i>                                        | CGC        |
| VC660       | <i>lin-40(ok905)</i>                                         | CGC        |
| MT12833     | <i>lin-61(n3809)</i>                                         | CGC        |
| MT15795     | <i>isw-1(n3294)</i>                                          | CGC        |
| MT13649     | <i>nurf-1(n4295)</i>                                         | CGC        |
| MT8839      | <i>lin-52(n771)</i>                                          | CGC        |
| MT5470      | <i>lin-37(n758)</i>                                          | CGC        |
| MT11147     | <i>dpl-1(n3643)</i>                                          | CGC        |
| MT20434     | <i>chaf-1(n5453)</i>                                         | CGC        |
| KC565       | <i>sin-3(tm1276)</i>                                         | CGC        |
| VC764       | <i>hat-1(ok1265)</i>                                         | CGC        |
| BAT762      | <i>daf-2(e1370); sin-3(tm1276)</i>                           | this study |
| BAT1368     | <i>myo-3p::lin-53_IR::2xNLS::tagRFP</i>                      | this study |
| BAT1265     | <i>myo-3p::lin-53::GFP::2xFLAG::SL2::tagRFP line 2</i>       | this study |
| BAT1982     | <i>tps-1p::mKATE::H2B</i>                                    | this study |
| BC18476     | <i>tps-2p::GFP</i>                                           | CGC        |

382

383 List of RNAi clones used in this study.

| Gene name      | derived from                                                 |
|----------------|--------------------------------------------------------------|
| empty vector   | Addgene                                                      |
| <i>lin-53</i>  | Tursun <i>et al.</i> , 2012                                  |
| <i>chd-3</i>   | Chromatin 2.0 library from (Hajduskova <i>et al.</i> , 2018) |
| <i>dcp-66</i>  |                                                              |
| <i>hda-1</i>   |                                                              |
| <i>let-418</i> |                                                              |
| <i>lin-40</i>  |                                                              |
| <i>lin-61</i>  |                                                              |

384

385 List of primers for qPCR

| Target | Sequence 5' - 3' |
|--------|------------------|
|--------|------------------|

|                                 |                           |
|---------------------------------|---------------------------|
| <i>cdc-42 fwd</i>               | ATGCAGACGATCAAGTGCGTCGTCG |
| <i>cdc-42 rev</i><br><i>qRT</i> | GTGGATACGATAGAGGCC        |
| <i>lin-53 fwd qRT</i>           | GTGTGGGACCTATCTAAGA       |
| <i>tps-1 fwd</i>                | AGATACGAATTTGCAAGAAAAAGT  |
| <i>tps-1 rev</i>                | TCCAGTTTTTCGGTTTCTCTCA    |

386

### 387 **Lifespan and locomotion assay**

388 For age synchronization, eggs were put on a plate, which was scored as day 0. Worms were  
389 grown until L4 stage at 15°C and then transferred to plates containing 5-Fluoro-2'-  
390 deoxyuridine (FUDR; 10 worms per plate) and further grown at 25°C. The animals were  
391 scored daily for survival and the locomotion was classified (categories A – C) (Herndon et al.,  
392 2002). Animals that did not show pharyngeal pumping or respond to podding were scored as  
393 dead. For data analysis of the survival OASIS was used (Han et al., 2016).

394

### 395 **Thrashing assay**

396 Age synchronized worms were put in a drop of 10 µl M9 buffer and a video was made using  
397 the DinoXcope software in combination with a Dino-Lite camera. The video was taken with a  
398 resolution of 640x480 with a frame rate of 24.00 fps for 30 seconds at normal quality. The  
399 calculation of the body bends was carried out using the ImageJ Plugin wrMTrck (Jesper S.  
400 Pedersen) with the according settings.

401

### 402 **Immunostaining and antibodies**

403 Staining was carried out as previously described (Seelk et al., 2016). In brief, worms were  
404 freeze-cracked after resuspension in 0,025 % glutaraldehyde between two frost-resistant  
405 glass slides on dry ice. The animals were fixed using Acetone/Methanol for 5 min each and  
406 washed off into PBS. Afterwards the sample was blocked in 0,25 % Triton + 0,2 % Gelatine  
407 in PBS and stained. Primary antibodies were diluted in PBS with 0,25 % Triton + 0,1 %  
408 Gelatine and the fixed worms were incubated overnight at 4°C. After PBS washes secondary  
409 antibody was added for 3 hrs. Worms were mounted with DAPI-containing mounting medium  
410 (Dianova, #CR-38448) on glass slides after further washing steps. The primary antibodies  
411 used were anti-MHC (1:300; DHSB #5-6-s) and anti-LIN-53 (1:800, Pineda). As Secondary  
412 antibodies Alexa Fluor dyes were applied at 1:1000 dilution. For phalloidin staining the worms  
413 were harvested with PBS and fixed with 4% formaldehyde in PBS. For freeze-cracking  
414 worms were frozen in liquid nitrogen followed by thawing at 4°C for three times. The samples  
415 was incubated for 30 min followed by three times washing with PBST for 10 min. Phalloidin-  
416 rhodamine in PBST was added and incubated for 30 min on room temperature. After a last  
417 washing for three 10 min in PBST the worms were mounted on slide using mounted with

418 DAPI-containing mounting medium (Dianova, #CR-38448). Microscopy was done using the  
419 Zeiss Axio Imager 2 fluorescent microscope.

420

#### 421 **RNA interference**

422 RNA inference was usually carried out as P0, meaning that eggs were put on RNAi plates  
423 and the same generation was scored. Worms were bleached and eggs were put on RNAi  
424 plates seeded with bacteria expressing dsRNA or carrying an empty RNAi vector and grown  
425 at 15°C until they reached L4 stage. If animals were used for a lifespan experiment, 10  
426 animals were put on one RNAi plate containing FuDR and cultured further at 25°C. For  
427 monitoring of the muscle structure worms were grown at 15°C until they reached the stage of  
428 interest and analyzed by fluorescent microscopy. For construction of the *lin-53* interaction  
429 partner sublibrary, candidate genes interacting with LIN-53 were chosen based on a  
430 literature search ([www.pubmed.com](http://www.pubmed.com)). The library was generated by compiling the clones  
431 from the chromatin RNAi sublibrary generated in Hajdoskova et al, 2018. The list of RNAi  
432 clones used can be found in table 0.

433

#### 434 **Generation of a *lin-53* hairpin construct**

435 For generation of a *lin-53* short hairpin construct (shRNA), the desired fragment was  
436 amplified using specific primers to introduce two different restriction sites at both ends of the  
437 cDNA of *lin-53* (Tavernarakis, Wang, Dorovkov, Ryazanov, & Driscoll, 2000). The restriction  
438 site is used as an inversion point to ligate two pieces of *lin-53* together to form an inverted  
439 repeat and clone into a plasmid carrying a muscle-specific promotor to enable expression of  
440 the *lin-53* shRNA in muscles.

441

#### 442 **Co-Immunoprecipitation with subsequent Mass Spectrometry (IP-MS)**

443 Worms were synchronized by bleaching and grown on 5 – 10 15 cm plates until L4 stage.  
444 Worms were washed off the plates using M9 buffer and freeze-cracked by adding the worm  
445 suspension dropwise to liquid nitrogen, pulverized using a hammer and a bio-pulverizer for  
446 20 – 30 times and afterwards ground to a fine powder using a mortar. The powder was  
447 thawed and dissolved in 1,5 vol lysis buffer (50 mM HEPES-KOH (pH 7,6); 1 mM EDTA; 0,25  
448 M LiCl; 1% sodium deoxycholate; 0,5 % NP-40; 100 mM NaCl; 10% Glycerol + 1 tablet of  
449 Complete in 10 ml of buffer). In order to shear DNA, the sample is sonicated using  
450 Bioruptor® device for six times with 30 sec ON and 30 sec OFF on high settings. The lysate  
451 is cleared by spinning and  $\mu$ MACS-DKYDDDK (Milteny Biotec) are added and incubated for  
452 30 min on ice, before the mixture is applied on a magnetic M column. After washing three  
453 times with lysis buffer the samples are eluted using 8 M guanidiniumhypochlorid pre-heated  
454 to 80°C for mass spectrometry (MS). Sample preparation for MS was done as described

455 previously (Hajduskova et al., 2018). Raw MS data was analyzed using MaxQuant Software  
456 (Cox & Mann, 2008).

457

#### 458 **RNA extraction**

459 Whole transcriptome sequencing was carried out as previously described (Kolundzic et al.,  
460 2018). In brief, RNA was extracted from control, *lin-53(n3368)*, *lin-53(bar19)* and *sin-*  
461 *3(tm1276)* animals using TRIzol (Life Technologies) and guanidinium thiocyanate-phenol-  
462 chloroform extraction. Adding chloroform to the TRIzol sample leads to a phase separation  
463 with the aqueous phase containing the RNA, an interphase and an organic phase containing  
464 DNA and proteins. The RNA was further purified from the aqueous phase using isopropanol.

465

#### 466 **qRT-PCR**

467 To analyze gene expression, RNA was first reverse transcribed using GoScript Reverse  
468 transcriptase (Promega) using oligo(dT) and random hexamer primers. The qPCR was  
469 carried out using Maxima SYBR Green/ROX qPCR Master Mix (2x) according to the  
470 manufacturer's instructions. The measurement was done using the CFX96 Touch Real-Time  
471 PCR Detection System from BioRad. *cdc-42* was used as a reference gene and relative  
472 expression was calculated using the Livak method (Schmittgen & Livak, 2008).

473

#### 474 **Whole transcriptome sequencing**

475 Library preparation for RNA-Sequencing was carried out using TruSeq RNA Library Prep Kit  
476 v2 (Illumina) according to the manufacturer's instructions. Libraries were sequenced using  
477 paired end sequencing length of a 100 nucleotides on a HiSeq4000 machine (Illumina).

478

#### 479 **Analysis of RNA-seq data**

480 The RNA-seq sequencing datasets were processed using the PiGx-RNAseq (Wurmus et al.,  
481 2018) pipeline (version 0.0.4), in which the quality of the raw fastq reads were improved using  
482 Trim Galore ([https://www.bioinformatics.babraham.ac.uk/projects/trim\\_galore/](https://www.bioinformatics.babraham.ac.uk/projects/trim_galore/)), gene-level  
483 expression was quantified using Salmon (Patro, Duggal, Love, Irizarry, & Kingsford, 2017) based  
484 on worm transcript annotations from the Ensembl database (version 89). The raw read  
485 counts were further processed using RUVs function of the RUVseq R package (Risso, Ngai,  
486 Speed, & Dudoit, 2014) to remove unwanted variation from the expression data. Covariates  
487 discovered using RUVseq was integrated with DESeq2 (Love, Huber, & Anders, 2014) to test  
488 for differential expression using a lfcThreshold of 0.5 and false discovery rate of 0.05. The  
489 GO term enrichment is calculated using the gProfileR package. The p-values are corrected  
490 for multiple testing. The default multiple testing correction method ("analytical") was used  
491 when running the gProfileR's main enrichment function `gprofiler`.

## 492 **ChIP-Seq**

493 In brief, in M9 arrested L1 worms were grown on OP50 plates for 40h to L4/YA stage at room  
494 temperature. Animals were washed three times with M9 and fixed with 2% formaldehyde for  
495 30 minutes followed by quenching with 0.125M glycine for 5 minutes. The samples were  
496 rinsed twice with PBS, and 200-300 ul of pellets were snap-frozen in liquid nitrogen and kept  
497 at -80°C. The pellets were washed once with 0.5 ml PBS + PMSF and resuspended in 1 ml  
498 FA Buffer (50mM HEPES/KOH pH 7.5, 1mM EDTA, 1% Triton X-100, 0.1 sodium  
499 deoxycholate, 150mM NaCl)+0.1% sarkosyl+protease inhibitor (Calbiochem) and then  
500 dounce-homogenized on ice with 30 strokes. The samples were sonicated with Biorupter  
501 with the setting of high power, 4°C, and 15 cycles of 30 sec on 30 sec off. Soluble chromatin  
502 was isolated by centrifugating for 15 min at max speed and 4°C. The cellular debris was  
503 resuspended in 0.5 FA Buffer+0.1% sarkosyl+protease inhibitor and sonicated again 15  
504 cycles with the same setting. Isolated soluble chromatin were combined. The  
505 immunoprecipitation of LIN-53 protein was performed overnight in a total volume of 600 µ l  
506 with 10 µl of PA58 (polyclonal peptide AB; rabbit, Pineda), while 5% of samples were taken  
507 as input. Immunocomplexes with collected with Protein A-Sepharose beads (Sigma). The  
508 beads were washed with 1 ml of following buffers: twice with FA Buffer for 5 min, FA-1M  
509 NaCl for 5 min, FA-0.5M NaCl for 10 min, TEL Buffer (0,25M LiCl, 1% NP-40, 1% Sodium  
510 deoxycholate, 1mM EDTA, 10mM Tris-HCl pH 8.0) for 10 min, and twice with TE Buffer  
511 (pH8.0). DNA-protein complexes were eluted in 250 ul ChIP elution buffer (1%SDS, 250mM  
512 NaCl, 10 mM Tris pH8.0, 1mM EDTA) at 65°C for 30 min by shaking at 1400 rpm. The Inputs  
513 were treated for approx. 3h with 20µg of RNAse A (Invitrogen). The samples and inputs were  
514 treated with 10µg of Proteinase K for 1h, and reverse cross-linked overnight at 65°C. DNA  
515 was purified with Qiagen MinElute PCR purification Kit. Sequencing library preparation was  
516 carried out using NEXTflex qRNA-seq Kit v2 Set A kit according to manufacturer's  
517 instructions. Libraries were sequenced with Hiseq 4000 mit 2x75 bp.

518

## 519 **ChIP-seq sequencing data processing**

520 The ChIP-seq sequencing datasets were processed using the PiGx-ChIPseq (Wurmus et al.,  
521 2018) pipeline (version 0.0.16), in which the quality of the raw fastq reads were improved  
522 using Trim Galore ([https://www.bioinformatics.babraham.ac.uk/projects/trim\\_galore/](https://www.bioinformatics.babraham.ac.uk/projects/trim_galore/)),  
523 processed reads were aligned to the DNA sequence assembly WBcel235 (Ensembl version  
524 89) using Bowtie2 (Langmead & Salzberg, 2012), the peaks were called using MACS2  
525 (Zhang et al., 2008), and the IDR (irreproducible discovery rate) peaks were called using the  
526 IDR software (Li, Qunhua Li, Brown, Huang, & Bickel, 2011).

527

528

529 **Data availability**

530 To see a detailed description of the downstream analysis of RNA-seq and ChIP-seq data,  
531 see the github repository: [https://github.com/BIMSBbioinfo/collab\\_seelk\\_tursun\\_lin53\\_paper](https://github.com/BIMSBbioinfo/collab_seelk_tursun_lin53_paper)

532

533 **Metabolome analysis**

534 Wild type, *daf-2(e1370)*, *lin-53(n3368)*, *sin-3(tm1276)*, *daf-2(e1370); lin-53(n3368)* double  
535 mutants were analyzed at L4 stage. For sample-collection worms were synchronized by  
536 bleaching and transferred to NGM-plates containing OP50 as food source. Worms were  
537 grown at 15°C until L3/4 stage and then shifted to 25°C until young adult stage. Worms were  
538 harvested in M9 medium and adjusted to approx. 40 mg of worms per sample. The sample  
539 extraction is performed by using methanol::chloroform::water (5:2:1, MCW; 1 ml per 50 mg  
540 sample). To lyse worms and immediately bring the metabolites in solution 500 µl ice-cold  
541 MCW (with cinnamic acid) is added to the frozen worm sample. The sample was transferred  
542 to a new tube containing Silica beads and lysed using mechanical force with a tissue lyser at  
543 6.500 <sup>m</sup>/s, 2x20 sec ON, 5 sec OFF for three times. To further solubilize, the lysate was  
544 sonicated for 10 min in an ultrasound bath. As much supernatant as possible was taken off  
545 the beads and the left over MCW (x – 500 µl) was added, the sample was vortexed and  
546 shortly incubated on dry ice. After shaking for 15 min, 1.400 rpm at 4°C 0,5 vol of water were  
547 added for phase separation. The sample was vortexed and shaken for 15 min, 1.400 rpm at  
548 4°C. Vortexing was repeated and the sample was spun at max. speed, 4°C for 10 min to  
549 ensure phase separation. The polar phase was taken off and further prepared for  
550 measurement. The polar phase was dried overnight in a speed vac followed by  
551 derivatization. For this, first 10 µl of 40 <sup>mg</sup>/<sub>ml</sub> methoxyamine hydrochloride (MeOx) solution in  
552 pyridine is added and incubated for 90 min at 30°C with shaking. Afterwards 30 µl N-Methyl-  
553 N-(trimethylsilyl) trifluoroacetamide (MSTFA) is added to the sample. Per 1.000 µl of MSTFA  
554 10 µl of a standard retention index mixture of different decanes (C17 mix) is dissolved in  
555 MSTFA. Everything is incubated at 30°C for 1 h with shaking. After spinning down for 10 min  
556 at full speed the samples are put into glass vials for the GC-MS. The data analysis was  
557 carried out using Maui-SILVIA (Kuich et al., 2014).

558

559 **Acknowledgement**

560 We thank ALina El-Khalili and Sergej Herzog and Tim Wolfram for technical assistance. Also,  
561 we are grateful for the support by Matthias Selbach and Stefan Kempa for proteomics and  
562 metabolomics applications. We thank the CGC, supported by the NIH, for providing strains,  
563 Ena Kolundic, Martina Hajduskova and Anna Reid for discussion and comments on the  
564 manuscript. All procedures conducted in this study were approved by the Berlin State  
565 Department for Health and Social (LaGeSo).

566

567 **Author contribution**

568 SM and BT designed the study and interpreted the results. SM, AK, BV, SB, and MH  
569 conducted experiments and analyzed data. SM and BT wrote the manuscript. BU and AA  
570 performed bioinformatic analyses. BT acquired funding for the project from the ERC. All  
571 authors assisted in editing the manuscript.

572

573 **Conflict of interest**

574 The authors declare that they have no competing interests.

575

576 **Funding**

577 This work was partly sponsored by the ERC-StG-2014-637530 and ERC CIG PCIG12-GA-  
578 2012-333922 and is supported by the Max Delbrueck Center for Molecular Medicine in the  
579 Helmholtz Association.

580

581

582



## 583 References

- 584 Allen, H. F., Wade, P. A., & Kutateladze, T. G. (2013). The NuRD architecture. *Cellular and*  
585 *Molecular Life Sciences : CMLS*, 70(19), 3513–3524. <http://doi.org/10.1007/s00018-012->  
586 1256-2
- 587 Bansal, A., Zhu, L. J., Yen, K., & Tissenbaum, H. A. (2015). Uncoupling lifespan and  
588 healthspan in *Caenorhabditis elegans* longevity mutants. *Proceedings of the National*  
589 *Academy of Sciences of the United States of America*, 201412192.  
590 <http://doi.org/10.1073/pnas.1412192112>
- 591 Barnes, V. L., Bhat, A., Unnikrishnan, A., Heydari, A. R., Arking, R., & Pile, L. A. (2014).  
592 SIN3 is critical for stress resistance and modulates adult lifespan. *Aging*, 6(8), 645–660.
- 593 Brunet, A., & Rando, T. A. (2017). ScienceDirect Interaction between epigenetic and  
594 metabolism in aging stem cells. *Current Opinion in Cell Biology*, 45, 1–7.  
595 <http://doi.org/10.1016/j.ceb.2016.12.009>
- 596 Chambers, S. M., Shaw, C. A., Gatz, C., Fisk, C. J., Donehower, L. A., & Goodell, M. A.  
597 (2007). Aging Hematopoietic Stem Cells Decline in Function and Exhibit Epigenetic  
598 Dysregulation. *PLoS Biol*, 5(8), e201–13. <http://doi.org/10.1371/journal.pbio.0050201>
- 599 Cheloufi, S., & Hochedlinger, K. (2017). ScienceDirect Emerging roles of the histone  
600 chaperone CAF-1 in cellular plasticity. *Current Opinion in Genetics & Development*, 46,  
601 83–94. <http://doi.org/10.1016/j.gde.2017.06.004>
- 602 Cheloufi, S., Elling, U., Hopfgartner, B., Jung, Y. L., Murn, J., Ninova, M., et al. (2015). The  
603 histone chaperone CAF-1 safeguards somatic cell identity. *Nature*, 528(7581), 218–224.  
604 <http://doi.org/10.1038/nature15749>
- 605 Cox, J., & Mann, M. (2008). MaxQuant enables high peptide identification rates,  
606 individualized p.p.b.-range mass accuracies and proteome-wide protein quantification.  
607 *Nature Biotechnology*, 26(12), 1367–1372. <http://doi.org/10.1038/nbt.1511>
- 608 De Vaux, V., Pfefferli, C., Passannante, M., Belhaj, K., Essen, von, A., Sprecher, S. G., et al.  
609 (2013). The *Caenorhabditis elegans* LET-418/Mi2 plays a conserved role in lifespan  
610 regulation. *Aging Cell*, 12(6), 1012–1020. <http://doi.org/10.1111/ace1.12129>
- 611 Eitoku, M., Sato, L., Senda, T., & Horikoshi, M. (2008). Histone chaperones: 30 years from  
612 isolation to elucidation of the mechanisms of nucleosome assembly and disassembly.  
613 *Cellular and Molecular Life Sciences : CMLS*, 65(3), 414–444.  
614 <http://doi.org/10.1007/s00018-007-7305-6>
- 615 Field, A. E., & Adams, P. D. (2017). Targeting chromatin aging - The epigenetic impact of  
616 longevity-associated interventions. *Experimental Gerontology*, 94, 29–33.  
617 <http://doi.org/10.1016/j.exger.2016.12.010>
- 618 Finkel, T. (2015). The metabolic regulation of aging. *Nature Medicine*, 21(12), 1416–1423.  
619 <http://doi.org/10.1038/nm.3998>
- 620 Greer, E. L., Maures, T. J., Hauswirth, A. G., Green, E. M., Leeman, D. S., Maro, G. S., et al.  
621 (2010). Members of the H3K4 trimethylation complex regulate lifespan in a germline-  
622 dependent manner in *C. elegans*. *Nature*, 466(7304), 383–387.  
623 <http://doi.org/10.1038/nature09195>
- 624 Guasconi, V., & Puri, P. L. (2009). Chromatin: the interface between extrinsic cues and the  
625 epigenetic regulation of muscle regeneration. *Trends in Cell Biology*, 19(6), 286–294.  
626 <http://doi.org/10.1016/j.tcb.2009.03.002>
- 627 Hajduskova, M., Baytek, G., Kolundzic, E., Gosdschan, A., Kazmierczak, M., Ofenbauer, A.,  
628 et al. (2018). MRG-1/MRG15 Is a Barrier for Germ Cell to Neuron Reprogramming in  
629 *Caenorhabditis elegans*. *Genetics*, genetics.301674.2018–62.  
630 <http://doi.org/10.1534/genetics.118.301674>
- 631 Hammond, C. M., Strømme, C. B., Huang, H., Patel, D. J., & Groth, A. (2017). Histone  
632 chaperone networks shaping chromatin function. *Nature Reviews Molecular Cell Biology*,  
633 18(3), 141–158. <http://doi.org/10.1038/nrm.2016.159>
- 634 Han, S. K., Lee, D., Lee, H., Kim, D., Son, H. G., Yang, J.-S., et al. (2016). OASIS 2: online  
635 application for survival analysis 2 with features for the analysis of maximal lifespan and  
636 healthspan in aging research. *Oncotarget*, 7(35), 56147–56152.  
637 <http://doi.org/10.18632/oncotarget.11269>

- 638 Harrison, M. M., Ceol, C. J., Lu, X., & Horvitz, H. R. (2006). Some *C. elegans* class B  
639 synthetic multivulva proteins encode a conserved LIN-35 Rb-containing complex distinct  
640 from a NuRD-like complex, *103*(45), 16782–16787.  
641 <http://doi.org/10.1073/pnas.0608461103>
- 642 Herndon, L. A., Schmeissner, P. J., Dudaronek, J. M., Brown, P. A., Listner, K. M., Sakano,  
643 Y., et al. (2002). Stochastic and genetic factors influence tissue-specific decline in ageing  
644 *C. elegans*. *Nature*, *419*(6909), 808–814. <http://doi.org/10.1038/nature01135>
- 645 Hibshman, J. D., Doan, A. E., Moore, B. T., Kaplan, R. E., Hung, A., Webster, A. K., et al.  
646 (2017). *daf-16*/FoxO promotes gluconeogenesis and trehalose synthesis during  
647 starvation to support survival. *eLife*, *6*, 268. <http://doi.org/10.7554/eLife.30057>
- 648 Honda, Y., Tanaka, M., & Honda, S. (2010). Trehalose extends longevity in the nematode  
649 *Caenorhabditis elegans*. *Aging Cell*, *9*(4), 558–569. <http://doi.org/10.1111/j.1474-9726.2010.00582.x>
- 651 Jaul, E., & Barron, J. (2017). Age-Related Diseases and Clinical and Public Health  
652 Implications for the 85 Years Old and Over Population. *Frontiers in Public Health*, *5*,  
653 354–7. <http://doi.org/10.3389/fpubh.2017.00335>
- 654 Kenyon, C. (2011). The first long-lived mutants: discovery of the insulin/IGF-1 pathway for  
655 ageing. *Philosophical Transactions of the Royal Society B: Biological Sciences*,  
656 *366*(1561), 9–16. <http://doi.org/10.1098/rstb.2010.0276>
- 657 Kolundzic, E., Ofenbauer, A., Bulut, S. I., Uyar, B., Baytek, G., Sommermeier, A., et al.  
658 (2018). FACT Sets a Barrier for Cell Fate Reprogramming in *Caenorhabditis elegans* and  
659 Human Cells. *Developmental Cell*, 1–47. <http://doi.org/10.1016/j.devcel.2018.07.006>
- 660 Kuich, P. H. J. L., Hoffmann, N., & Kempa, S. (2014). Maui-VIA: A User-Friendly Software for  
661 Visual Identification, Alignment, Correction, and Quantification of Gas Chromatography-  
662 Mass Spectrometry Data. *Frontiers in Bioengineering and Biotechnology*, *2*, 84.  
663 <http://doi.org/10.3389/fbioe.2014.00084>
- 664 Langmead, B., & Salzberg, S. L. (2012). Fast gapped-read alignment with Bowtie 2. *Nature*  
665 *Methods*, *9*(4), 357–359. <http://doi.org/10.1038/nmeth.1923>
- 666 Li, Q., Qunhua Li, J. B. B. H. H. P. J. B., Brown, J. B., Huang, H., & Bickel, P. J. (2011).  
667 Measuring reproducibility of high-throughput experiments. *The Annals of Applied*  
668 *Statistics*, *5*(3), 1752–1779. <http://doi.org/10.1214/11-AOAS466>
- 669 Love, M. I., Huber, W., & Anders, S. (2014). Moderated estimation of fold change and  
670 dispersion for RNA-seq data with DESeq2. *Genome Biology*, *15*(12), 550.  
671 <http://doi.org/10.1186/s13059-014-0550-8>
- 672 Loyola, A., & Almouzni, G. (2004). Histone chaperones, a supporting role in the limelight.  
673 *Biochimica Et Biophysica Acta (BBA)-Gene Structure and Expression*, *1677*(1-3), 3–11.  
674 <http://doi.org/10.1016/j.bbaexp.2003.09.012>
- 675 Lu, X., & Horvitz, H. R. (1998). *lin-35* and *lin-53*, two genes that antagonize a *C. elegans* Ras  
676 pathway, encode proteins similar to Rb and its binding protein RbAp48. *Cell*, *95*(7), 981–  
677 991.
- 678 Margueron, R., & Reinberg, D. (2011). The Polycomb complex PRC2 and its mark in life.  
679 *Nature*, *469*(7330), 343–349. <http://doi.org/10.1038/nature09784>
- 680 Nicolas, E., Morales, V., Magnaghi-Jaulin, L., Harel-Bellan, A., Richard-Foy, H., & Trouche,  
681 D. (2000). RbAp48 belongs to the histone deacetylase complex that associates with the  
682 retinoblastoma protein. *The Journal of Biological Chemistry*, *275*(13), 9797–9804.
- 683 Onder, T. T., Kara, N., Cherry, A., Sinha, A. U., Zhu, N., Bernt, K. M., et al. (2012).  
684 Chromatin-modifying enzymes as modulators of reprogramming. *Nature*, 1–7.  
685 <http://doi.org/10.1038/nature10953>
- 686 Patro, R., Duggal, G., Love, M. I., Irizarry, R. A., & Kingsford, C. (2017). Salmon provides  
687 fast and bias-aware quantification of transcript expression. *Nature Methods*, *14*(4), 417–  
688 419. <http://doi.org/10.1038/nmeth.4197>
- 689 Pavlopoulos, E., Jones, S., Kosmidis, S., Close, M., Kim, C., Kovalerchik, O., et al. (2013).  
690 Molecular Mechanism for Age-Related Memory Loss: The Histone-Binding Protein  
691 RbAp48. *Science Translational Medicine*, *5*(200), 200ra115–200ra115.  
692 <http://doi.org/10.1126/scitranslmed.3006373>
- 693 Pegoraro, G., Kubben, N., Wickert, U., Göhler, H., Hoffmann, K., & Misteli, T. (2009). Ageing-

694 related chromatin defects through loss of the NURD complex. *Nature Cell Biology*,  
695 11(10), 1261–1267. <http://doi.org/10.1038/ncb1971>

696 Peleg, S., Feller, C., Ladurner, A. G., & Imhof, A. (2016). The Metabolic Impact on Histone  
697 Acetylation and Transcription in Ageing. *Trends in Biochemical Sciences*, 41(8), 700–  
698 711. <http://doi.org/10.1016/j.tibs.2016.05.008>

699 Ren, R., Ocampo, A., Liu, G.-H., & Belmonte, J. C. I. (2017). Regulation of Stem Cell Aging  
700 by Metabolism and Epigenetics. *Cell Metabolism*, 26(3), 460–474.  
701 <http://doi.org/10.1016/j.cmet.2017.07.019>

702 Risso, D., Ngai, J., Speed, T. P., & Dudoit, S. (2014). Normalization of RNA-seq data using  
703 factor analysis of control genes or samples. *Nature Biotechnology*, 32(9), 896–902.  
704 <http://doi.org/10.1038/nbt.2931>

705 Schmittgen, T. D., & Livak, K. J. (2008). Analyzing real-time PCR data by the comparative  
706 CT method. *Nature Protocols*, 3(6), 1101–1108. <http://doi.org/10.1038/nprot.2008.73>

707 Seelk, S., Adrian-Kalchhauser, I., Hargitai, B., Hajduskova, M., Gutnik, S., Tursun, B., &  
708 Ciosk, R. (2016). Increasing Notch signaling antagonizes PRC2-mediated silencing to  
709 promote reprogramming of germ cells into neurons. *eLife*, 5.  
710 <http://doi.org/10.7554/eLife.15477>

711 Seo, Y., Kingsley, S., Walker, G., Mondoux, M. A., & Tissenbaum, H. A. (2018). Metabolic  
712 shift from glycogen to trehalose promotes lifespan and healthspan in *Caenorhabditis*  
713 *elegans*. *Proceedings of the National Academy of Sciences of the United States of*  
714 *America*, 115(17), 9174–9179. <http://doi.org/10.1073/pnas.1714178115>

715 Tavernarakis, N., Wang, S. L., Dorovkov, M., Ryazanov, A., & Driscoll, M. (2000). Heritable  
716 and inducible genetic interference by double-stranded RNA encoded by transgenes.  
717 *Nature Genetics*, 24(2), 180–183. <http://doi.org/10.1038/72850>

718 Tursun, B., Patel, T., Kratsios, P., & Hobert, O. (2011). Direct conversion of *C. elegans* germ  
719 cells into specific neuron types. *Science (New York, NY)*, 331(6015), 304–308.  
720 <http://doi.org/10.1126/science.1199082>

721 Verreault, A., Kaufman, P. D., Kobayashi, R., & Stillman, B. (1996). Nucleosome assembly  
722 by a complex of CAF-1 and acetylated histones H3/H4. *Cell*, 87(1), 95–104.

723 Wurmus, R., Uyar, B., Osberg, B., Franke, V., Godschan, A., Wreczycka, K., et al. (2018).  
724 PiGx: reproducible genomics analysis pipelines with GNU Guix. *GigaScience*, 7(12).  
725 <http://doi.org/10.1093/gigascience/giy123>

726 Yadav, T., Quivy, J.-P., & Almouzni, G. (2018). Chromatin plasticity: A versatile landscape  
727 that underlies cell fate and identity. *Science (New York, NY)*, 361(6409), 1332–1336.  
728 <http://doi.org/10.1126/science.aat8950>

729 Zaremba-Czogalla, M., Dubińska-Magiera, M., & Rzepecki, R. (2010). Laminopathies: The  
730 molecular background of the disease and the prospects for its treatment. *Cellular &*  
731 *Molecular Biology Letters*, 16(1), 114–148. <http://doi.org/10.2478/s11658-010-0038-9>

732 Zhang, Y., Liu, T., Meyer, C. A., Eeckhoute, J., Johnson, D. S., Bernstein, B. E., et al. (2008).  
733 Model-based analysis of ChIP-Seq (MACS). *Genome Biology*, 9(9), R137.  
734 <http://doi.org/10.1186/gb-2008-9-9-r137>

735  
736  
737

738 **Supporting Information**

739 **Fig. S 1** Loss of *lin-53* leads to motility defects due to disruption of muscles.

740 **Fig. S2:** LIN-53 cooperates with NuRD to maintain muscle integrity.

741 **Fig. S3:** Depletion of *lin-53* in *sin-3* mutants does not further decrease lifespan.

742 **Fig. S4:** Transcriptome analysis of *lin-53* mutants.

743 **Fig. S5:** Loss of LIN-53 leads to decreased expression of Trehalose-phosphate synthase  
744 genes *tps-1* and *tps-2*.

745 **Table S1:** Lifespan scoring data.

746

## 747 **Figure Legends**

748 **Fig. 1.** Loss of LIN-53 causes locomotion defects and short lifespan. (A) L4 control and *lin-53*  
749 mutant worms were put on solid agar plates and the movement on solid agar was monitored  
750 using graph paper (sketch on the right side of the graph). *lin-53* mutant animals move  
751 significantly slower than control animals. Statistical analysis was carried out using unpaired t-  
752 test; \*\*\*  $p < 0,0001$ . (B) Control and *lin-53* mutant animals at three different developmental  
753 stages (L4 larvae, young adult animals and adults at day 2) were put in M9 medium, motility  
754 was recorded and the body bends were counted using the ImageJ WrmTrck plugin. At all  
755 developmental stages *lin-53* mutants swim significantly slower than control animals.  
756 Statistical analysis was carried out using unpaired one-way ANOVA; \*\*\*  $p < 0,0001$ . (C)  
757 Phalloidin binds to F-actin in body wall muscles. In *lin-53* mutants animals the muscle  
758 structure is disrupted compared to control animals. (D) The muscle structure of *lin-53*  
759 mutants and control animals at two different developmental stages (young adult and adult  
760 day 2) was analyzed using an antibody against MHC in immunostaining. The muscle  
761 structure is disrupted in *lin-53* mutants compared to control animals at both stages. (E)  
762 Worms expressing a *Pmyo-3::GFP* reporter were subjected to control and *lin-53* RNAi at  
763 different developmental stages (L4, young adults, adult day 2). At all three stages a muscle  
764 structure disruption is detectable upon loss of *lin-53*. (F) Expression of recombinant LIN-53  
765 only in muscles rescues the motility defect of *lin-53* mutants. Statistical analysis was carried  
766 out using unpaired one-way ANOVA; \*\*\*  $p < 0,0001$ , ns = not significant. (G) Depletion of *lin-*  
767 *53* decreases the lifespan of *C. elegans* by 5 days ( $p$ -value  $< 0,0001$ ). wt animals (grey line;  
768 mean lifespan  $13,66 \pm 0,26$  days), *lin-53* mutants (red line; mean lifespan  $8,69 \pm 0,16$  days).  
769 Triplicate experiments with 40 animals per repeat. Survival analysis was carried using  
770 Kaplan-Meier-estimator,  $p$ -value was calculated using Log-Rank Test. (H) The short lifespan  
771 of *lin-53* mutants is not rescued upon overexpression of *lin-53* in muscles but upon  
772 ubiquitous expression using the *baf-1* promoter. Triplicate experiments with 40 animals per  
773 repeat. Survival analysis was done using Kaplan-Meier-estimator,  $P$ -value was calculated  
774 using Log-Rank Test.

775

776 **Fig. 2:** Loss of NuRD complex members phenocopy muscle defects of *lin-53* mutants. (A)  
777 Screening whether RNAi against genes encoding LIN-53-interacting phenocopy muscle  
778 integrity disruption as seen in *lin-53* mutants based on *Pmyo-3::GFP*. Representative  
779 fluorescent pictures of the *Pmyo-3::GFP* reporter are shown. (B) RNAi-depletion of NuRD  
780 complex members phenocopies *lin-53<sup>-/-</sup>* muscle phenotype. Disruption of the muscle-  
781 structure was scored: 0 = no effect, + = slight effect, ++ = medium defect, +++ = strong  
782 defect. (C) Depletion of NuRD complex members does not phenocopy the short lifespan of  
783 *lin-53* mutants. Survival analysis was carried out using Kaplan-Meier-estimator, p-value was  
784 calculated using Log-Rank Test. The experiment was done at least two times with at least 40  
785 animals per repeat.

786

787 **Fig. 3:** Lifespan of mutants for LIN-53-interactors. (A) Depletion of Sin3 complex member  
788 SIN-3 leads to shortened lifespan (violet line; mean lifespan  $10,46 \pm 0,15$  days, p-value <  
789 0,0001; compared to control; grey line; mean lifespan  $13,66 \pm 0,26$  days. Survival analysis  
790 was carried out using Kaplan-Meier-estimator, p-value was calculated using Log-Rank Test.  
791 The experiment was done at least three times with at least 40 animals per repeat. (B - E)  
792 Lifespan analysis of different mutants from the DRM, Nurf, CAF1 and HAT1 complex.  
793 Survival analysis was carried out using Kaplan-Meier-estimator, p-value was calculated using  
794 Log-Rank Test. The experiment was done at least three times with at least 40 animals per  
795 repeat.

796

797 **Fig. 4:** Differentially expressed genes in *lin-53* and *sin-3* mutants. (A) Heat-map of the  
798 normalized expression values (VST) of the Top 100 Genes with highest variance across  
799 samples in *lin-53(n3368)* and *lin-53(bar19)* mutants compared to control animals. (B) Venn  
800 diagram of differentially expressed genes in *lin-53(n3368)* and *lin-53(bar19)* mutants showing  
801 more than 5.000 overlapping genes. (C-D) Gene Ontology (GO) term analysis based on  
802 KEGG pathways of *lin-53* mutants compared to control animals using PANTHER. Mainly  
803 genes involved in metabolic processes are affected upon loss of *lin-53*. (E) Venn diagram of  
804 differentially expressed genes in *lin-53* and *sin-3* mutants. (G) GO-term analysis of ChIP-Seq  
805 results using PANTHER GO-Slim biological processes (KEGG pathways) for genes that are  
806 bound by LIN-53 and are either up regulated or down-regulated.

807



808 **Fig. 5:** Metabolome analysis reveals decreased Trehalose biosynthesis in mutants. (A)  
809 Metabolome analysis of wt, *lin-53*<sup>-/-</sup>, *sin-3*<sup>-/-</sup>, and *let-418*<sup>-/-</sup> mutants. 215 different metabolites  
810 were detected using GC-MS. The data was z-transformed and plotted as a heat-map.  
811 Trehalose is decreased in *lin-53* and *sin-3* mutants, but not changed in wt and long-lived *let-*  
812 *418* mutants. 2 biological repeats were analyzed. (B) Depletion of *lin-53* leads to  
813 decreased expression of *tps-1p::mKate* and *tps-2p::GFP*. Control and *lin-53* RNAi-treated  
814 worms were mounted next to each other allowing direct comparison. Upon *lin-53* RNAi  
815 animals show a decrease in expression of both reporters. (C) Short lifespan of *lin-53* and *sin-*  
816 *3* mutants is partially rescued after feeding with Trehalose (mean lifespan of *lin-53* mutants  
817 on trehalose  $10,98 \pm 0,13$  days; *lin-53* mutants  $8,58 \pm 0,13$  days, p-value < 0,0001; mean  
818 lifespan of *sin-3* mutants on Trehalose  $10,46 \pm 0,15$  days; *sin-3* mutants  $10,46 \pm 0,15$  days,  
819 p-value < 0,0001). The experiments were carried out three times with at least 40 animals  
820 scored per repeat. Survival analysis was done using Kaplan-Meier-estimator, p-value was  
821 calculated using Log-Rank Test.

822

823 **Fig. 6:** The Insulin/IGF1 receptor mutant *daf-2(e1370)* restores Trehalose levels. (A) The  
824 short lifespan of *lin-53* mutants is partially rescued by *daf-2*. wt animals (grey line; mean  
825 lifespan  $13,66 \pm 0,26$  days), *lin-53* mutants (red line; mean lifespan  $8,69 \pm 0,16$  days), *daf-2*  
826 mutants (green line; mean lifespan  $28,29 \pm 0,75$  days), *daf-2; lin-53* double mutants (orange  
827 line; mean lifespan  $14,02 \pm 0,47$  days). Triplicate experiments were carried out with 40  
828 animals per repeat. Survival analysis was carried using Kaplan-Meier-estimator, p-value was  
829 calculated using Log-Rank Test. (B) As seen for *lin-53* mutants, short lifespan of *sin-3*  
830 mutants is suppressed by the *daf-2(e1370)* mutation. wt animals (grey line; mean lifespan  
831  $13,66 \pm 0,26$  days), *sin-3* mutants (violet line; mean lifespan  $10,46 \pm 0,15$  days), *daf-2*  
832 mutants (green line; mean lifespan  $28,29 \pm 0,75$  days), *daf-2 sin-3* double mutants (brown  
833 line; mean lifespan  $22,42 \pm 0,63$  days). Triplicate experiments were carried out with 40  
834 animals per repeat. Survival analysis was carried using Kaplan-Meier-estimator, p-value was  
835 calculated using Log-Rank Test. (C) Metabolome analysis of wt, *lin-53*<sup>-/-</sup>, *daf-2*<sup>-/-</sup>, *lin-53*<sup>-/-</sup>; *daf-*  
836 *2*<sup>-/-</sup>, *sin-3*<sup>-/-</sup>, *sin-3*<sup>-/-</sup> and *daf-2*<sup>-/-</sup> mutants. Trehalose levels are increases in long-lived *daf-2*  
837 (*e1370*) mutants. The GC-MS data was z-transformed and plotted in a heat-map. Trehalose  
838 is increased in *daf-2* and restored in *daf-2; lin-53* double mutants as well as *sin-3; daf-2*  
839 double mutants. 2 biological repeats were analyzed. (D) Model summarizing the findings of  
840 LIN-53 implication if lifespan and healthspan regulation.

841

Figure S1

Müthel et al.

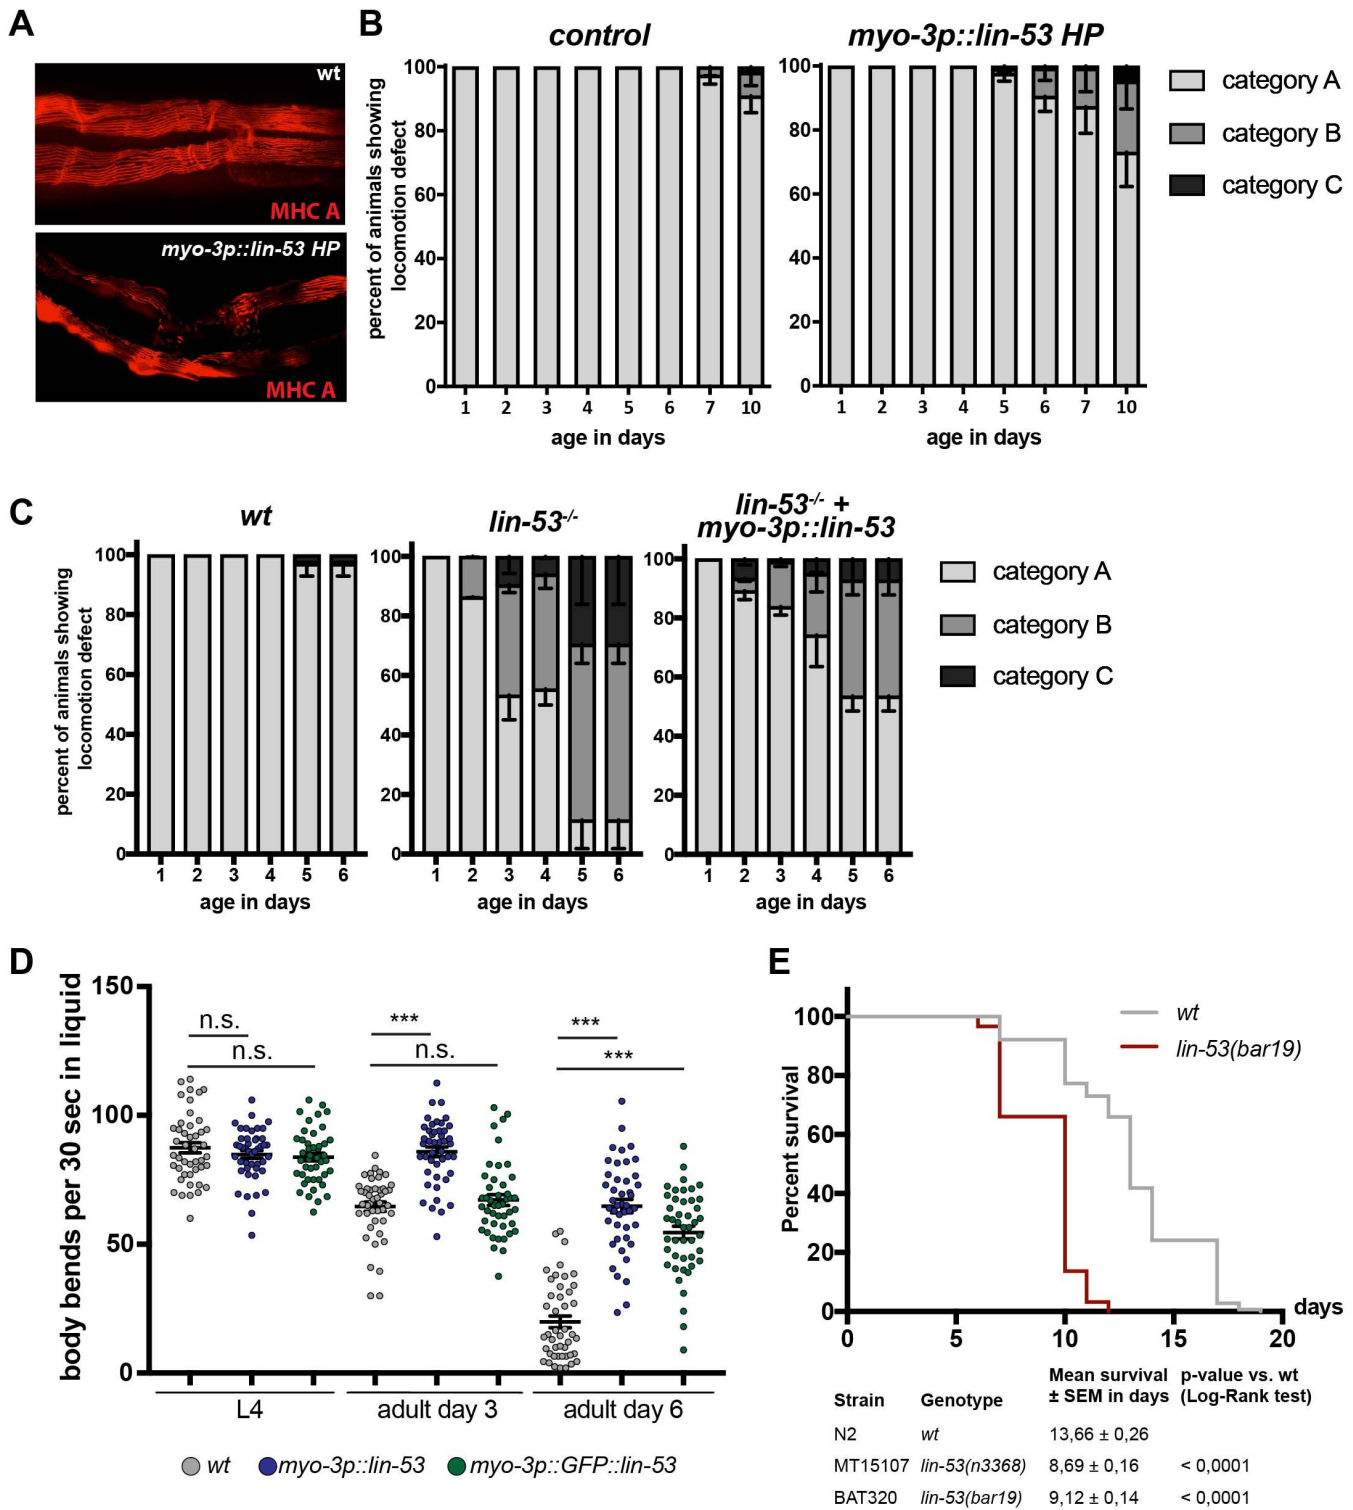

Figure S2

Müthel et al.

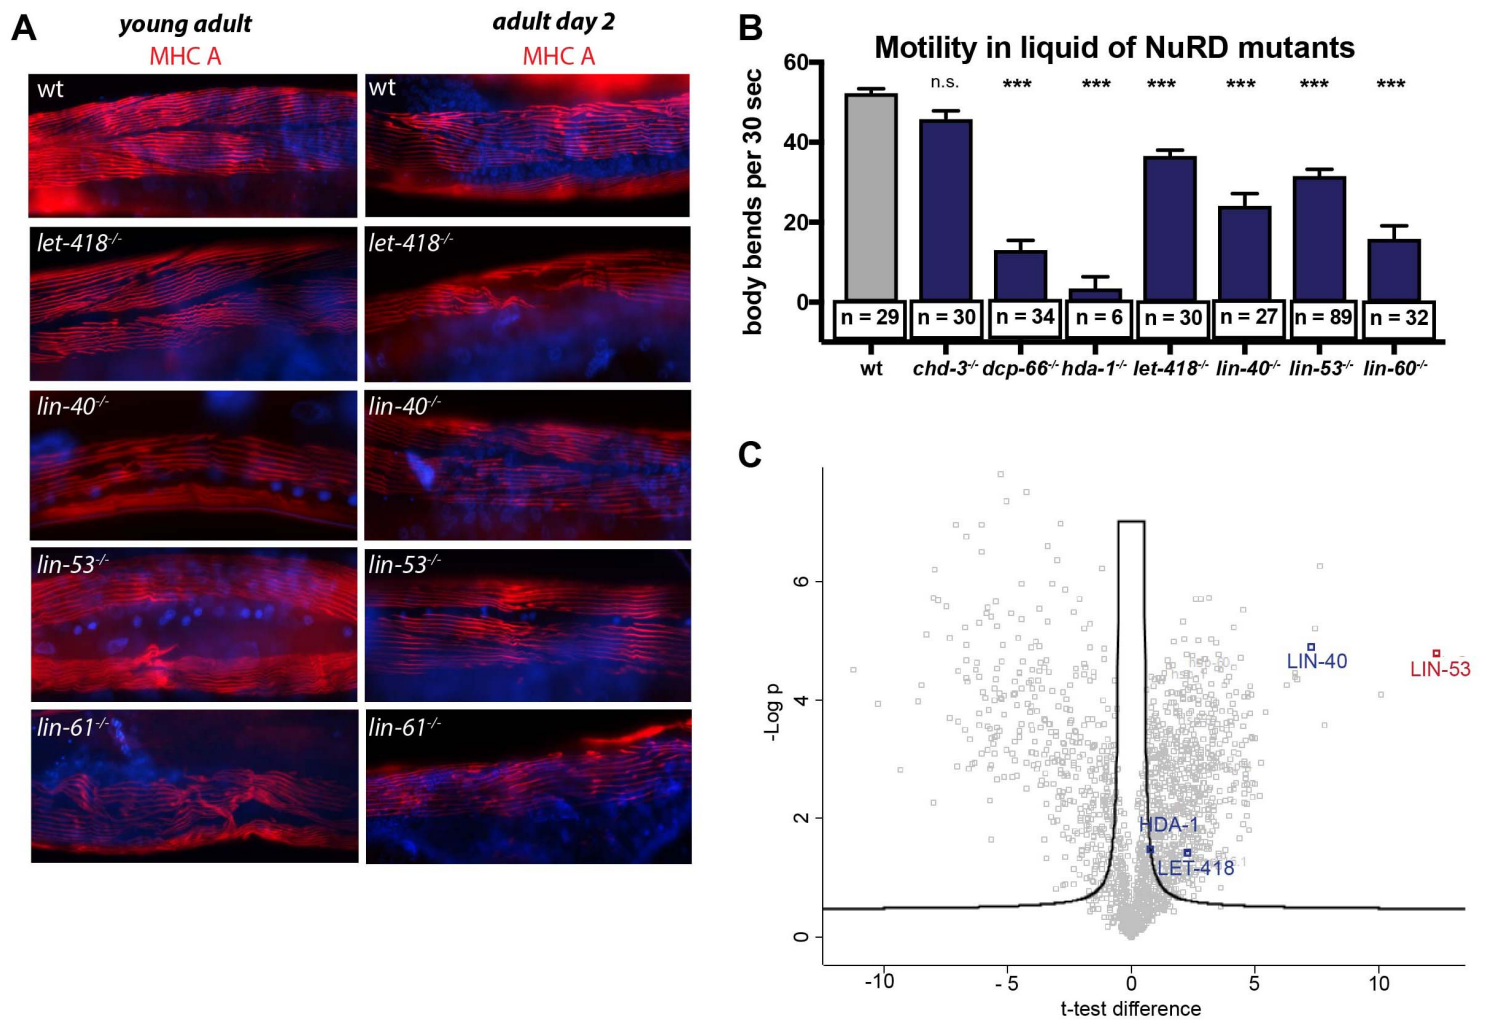

## Figure S3

Müthel et al.

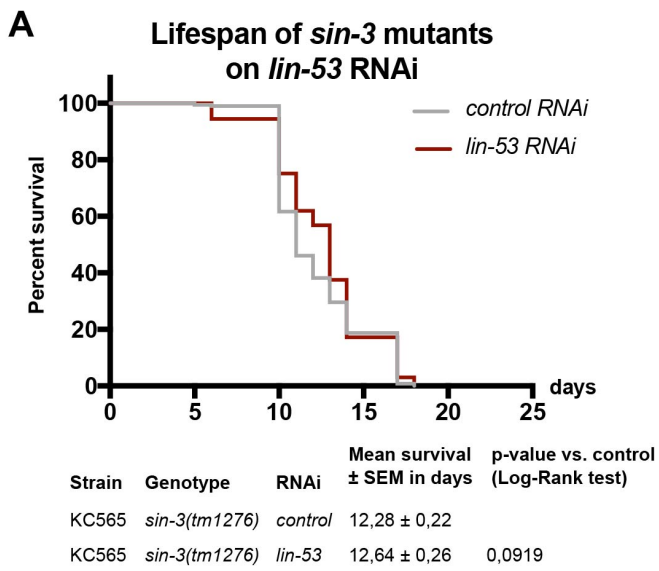

## Figure S4

Seelk-Müthel et al.

A

### GSEA for all genes differentially expressed

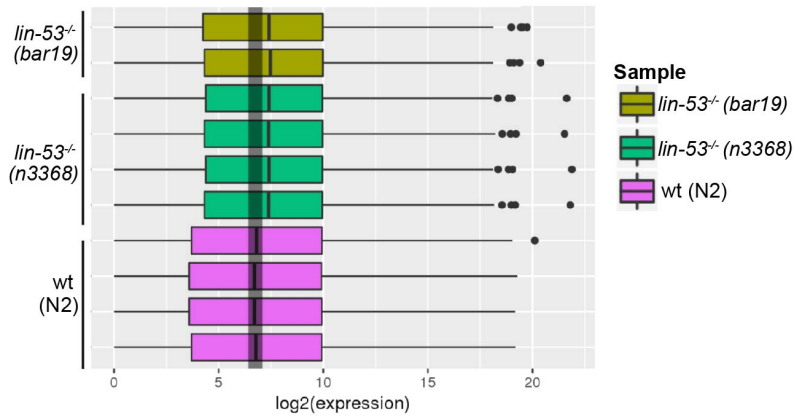

B

### GSEA for muscle-specific genes

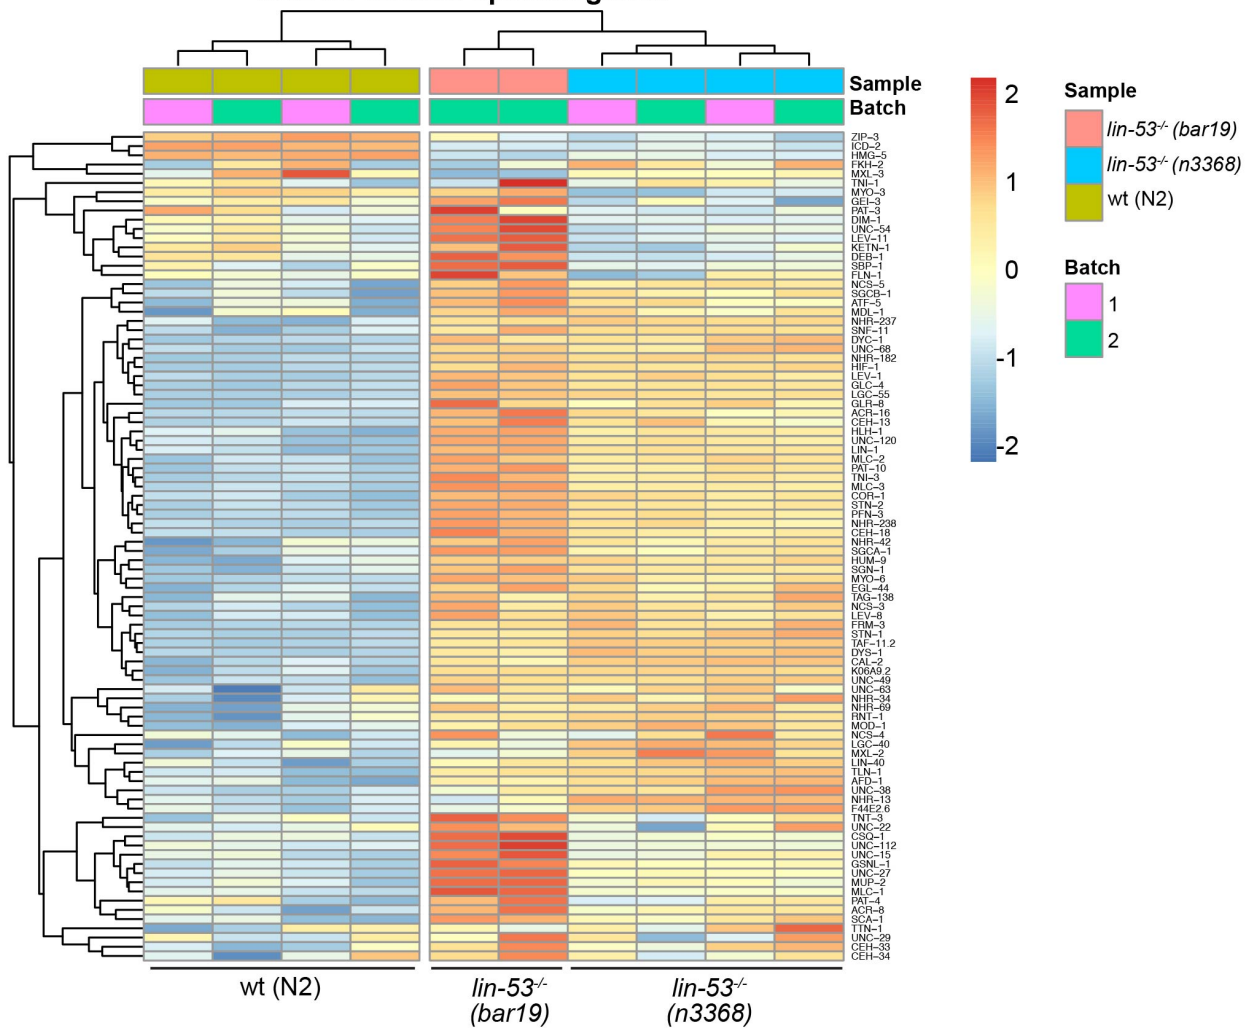

## Figure S5

Müthel et al.

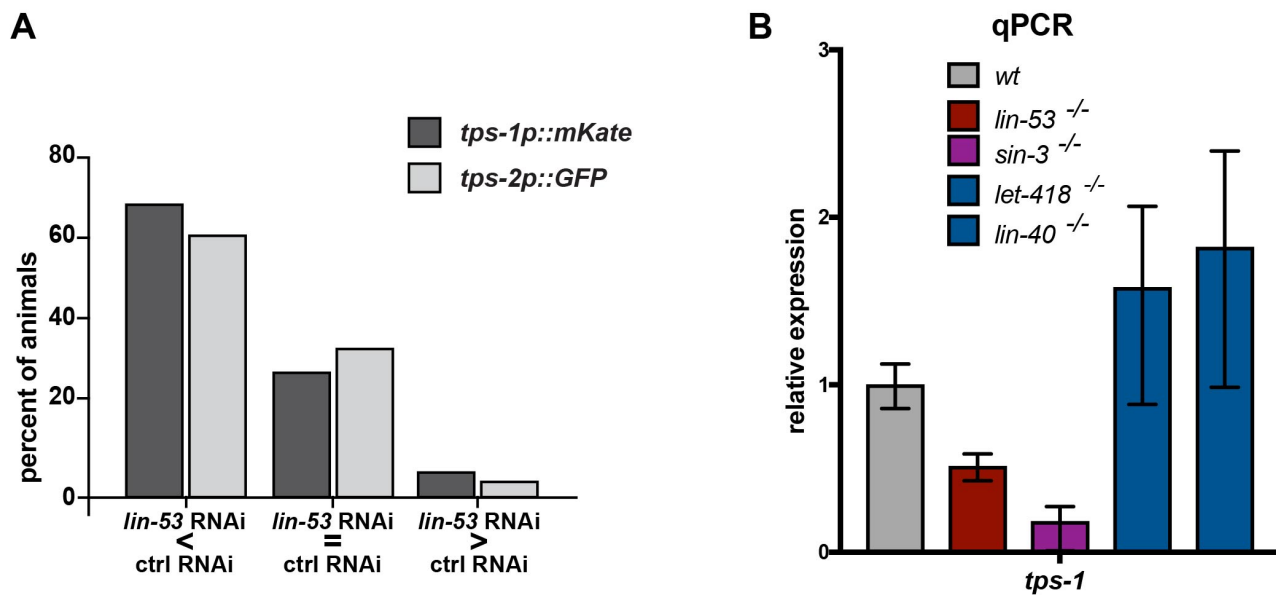

## 842 Supplemental Figure Legends

843 **Fig. S 1** Loss of *lin-53* leads to motility defects due to disruption of muscles. Muscle-specific  
844 *lin-53* RNAi by expressing a *lin-53* hairpin construct only in the muscles analyzed using MHC  
845 immunostaining. The muscle structure is disrupted in *myo-3p::lin-53 HP* compared to control  
846 animals. (B) To analyze the motility of wt and *myo-3p::lin-53 HR* the assay was carried out  
847 on solid agar and motility was monitored throughout lifetime. Movement was classified in  
848 three different categories based on Herndon *et al.*, 2002 (Herndon *et al.*, 2002): A = normal  
849 movement, B = impaired movement, C = no movement. Motility assays were carried out in  
850 triplicate using 50 animals per repeat. (C) Assay as in (B) with wt animals, *lin-53* mutants and  
851 *lin-53* mutants with muscle-specific *lin-53* overexpression (*myo-3p::lin-53*). The impaired  
852 movement of *lin-53* mutants is rescued by *myo-3p::lin-53*. Motility assays were carried out  
853 using 50 animals per repeat. Scoring was started as animals reached day 1 of adulthood. (D)  
854 Overexpression of *lin-53* in muscles (*myo-3p::lin-53* and *myo-3p::GFP::lin-53*) has beneficial  
855 effects on movement during aging. Body bends in liquid of L4 larvae, 3 days old adults, and  
856 6 days old adults were measured. Upon overexpressing of *lin-53* in muscles at older stages  
857 of adulthood, worms move significantly better than control animals. Statistical analysis was  
858 carried out using unpaired one-way ANOVA; \*\*\*  $p < 0,0001$ , ns = not significant. (E) The  
859 CRISPR mutant *lin-53(bar19)* has a decreased lifespan by 4 days ( $p$ -value  $< 0,0001$ ). Wild-  
860 type (wt) animals (grey line; mean lifespan  $13,66 \pm 0,26$  days), *lin-53(bar19)* CRISPR  
861 mutants (red line; mean lifespan  $9,12 \pm 0,14$  days), the experiment was carried out three  
862 times with at least 50 animals per repeat. Survival analysis was carried using Kaplan-Meier-  
863 estimator,  $p$ -value was calculated using Log-Rank Test.

864 **Fig. S2:** LIN-53 cooperates with NuRD to maintain muscle integrity. (A) Loss of the NuRD  
865 complex members disrupts muscle integrity as shown by immunostaining of myosin heavy  
866 chain (MHC) in *let-418*, *lin-40*, *lin-53* and *lin-61* mutants. Animals were at the young adult  
867 and 2 days old adult stage. (B) Motility of NuRD mutants in liquid. Thrashing assay was  
868 carried out as previously described. Statistics were done using One-way ANOVA (\*\*\*)  $p <$   
869  $0,0001$ ). Number of animals counted is indicated below the columns. Animals were kept  
870 continuously at 25°C, before scoring at day 7 after hatching. (C) Volcano plot of IP-MS of  
871 muscle-specific LIN-53 (*myo-3p::lin-53::2xFLAG*). Proteins enriched by LIN-53 pull-down  
872 were identified using permutation-based false discovery rate (FDR)-corrected two-sided t-  
873 test. The label-free quantification (LFQ) intensity of FLAG-pull down relative to control was  
874 calculated as difference and plotted on the x-axis against them  $-\log_{10}$ -transformed P-value of  
875 the t-test on the y-axis. The significance level (black line) was set to 0,05. Together with LIN-  
876 53 (red) the NuRD members LIN-40, LET-418 and HDA-1 (blue) were enriched suggesting  
877 that LIN-53 is interacting with the NuRD complex in muscles.



878 **Fig. S3:** Depletion of *lin-53* in *sin-3* mutants does not further decrease lifespan. (A) Depletion  
879 of *lin-53* by RNAi in *sin-3* mutants does not change the lifespan compared to control RNAi  
880 (*lin-53* RNAi, red line; mean lifespan  $12,64 \pm 0,26$  days; control RNAi grey line  $12,28 \pm 0,22$   
881 days; p-value < 0,0919). The experiment was carried out three times with 30 animals per  
882 repeat. Survival analysis was carried using Kaplan-Meier-estimator, p-value was calculated  
883 using Log-Rank Test.

884 **Fig. S4:** Transcriptome analysis of *lin-53* mutants. (A) Gene set enrichment analysis (GSEA)  
885 boxplots illustration for all gene families indicates that gene expression mostly increases  
886 upon loss of LIN-53. (B) Heat-map of the normalized expression values (VST) of muscle  
887 genes in *lin-53(n3368)* and *lin-53(bar19)* mutants compared to control animals.

888 **Fig. S5:** Loss of LIN-53 leads to decreased expression of Trehalose-phosphate synthase  
889 genes *tps-1* and *tps-2*. (A) Quantification of changed expression of *tps-1p::mKate* and *tps-*  
890 *2p::GFP* upon *lin-53* and control RNAi. Altogether 62 pairs of animals on *lin-53* and control  
891 animals were scored. More than 60 % of animals expressing the *tps-1p::mKate* or *tps-*  
892 *2p::GFP* reporter show decreased expression upon *lin-53* RNAi when compared to control  
893 animals. (B) qRT-PCR analysis of *tps-1* expression in *lin-53*, *sin-3*, *let-418*, and *lin-40*  
894 mutants. Expression decreases only in *lin-53* and *sin-3* mutants. Relative expression was  
895 calculated using the Livak method and statistics was done using unpaired t-test (\*\* p-value <  
896 0,001, \*\* p-value < 0,05).

897
